1  
2  
3  
4  
5  
6  
7  
8  
9  
10  
11  
12  
13  
14  
15  
16  
17  
18  
19  
20  
21  
22  
23  
24  
25  
26  
27  
28  
29

**Vigilance and behavioral state-dependent modulation of cortical neuronal activity throughout the sleep/wake cycle**

Aurélie Brécier, Mélodie Borel, Nadia Urbain, Luc J. Gentet

Integrated Physiology of Brain Arousal Systems, Lyon Neuroscience Research Center, INSERM U1028-CNRS UMR5292, Université Claude-Bernard Lyon 1, 69372 Lyon, France.

**Running title:** Interneuronal activity during the sleep-wake cycle

**Author contribution:** L.G. designed research; A.B performed research; A.B analyzed data; M.B. and L.G helped in data analysis; A.B. and L.G. wrote the manuscript; N.U. commented on the manuscript.

**Acknowledgements:** We would like to thank J.C. Comte for technical assistance. This work was funded by a doctoral studentship from the French Ministry of Education (A.B.), ANR PARADOX (ANR-17-CE16-0024) (A.B. and L.G.), and FLAG-ERA JTC 2015 project CANON (co-financed by ANR) (M.B. and L.G.).

Correspondence should be addressed to:

Luc Gentet, Lyon Neuroscience Research Center, Neurocampus  
Ch Le Vinatier Batiment 462  
95, Boulevard Pinel  
69675 BRON  
France

E-mail: luc.gentet@inserm.fr

30 **ABSTRACT**

31 GABAergic inhibitory neurons, through their molecular, anatomic and physiological diversity,  
32 provide a substrate for the modulation of ongoing cortical circuit activity throughout the sleep-  
33 wake cycle. Here, we investigated neuronal activity dynamics of parvalbumin (PV), vasoactive  
34 intestinal polypeptide (VIP) and somatostatin (SST) neurons in naturally-sleeping head-  
35 restrained mice at the level of layer 2/3 of the primary somatosensory barrel cortex of mice.  
36 Through calcium-imaging and targeted single-unit loose-patch or whole-cell recordings, we  
37 found that PV action potential (AP) firing activity was largest during both NREM (non-rapid  
38 eye movement) and REM sleep stages, that VIP neurons were activated during REM sleep and  
39 that the overall activity of SST neurons remained stable throughout the sleep/wake cycle.  
40 Analysis of neuronal activity dynamics uncovered rapid decreases in PV cell firing at wake  
41 onset followed by a progressive recovery during wake. Simultaneous local field potential (LFP)  
42 recordings further revealed that, except for SST neurons, a large proportion of neurons were  
43 modulated by ongoing delta and theta waves. During NREM sleep spindles, PV and SST  
44 activity increased and decreased, respectively. Finally, we uncovered the presence of whisking  
45 behavior in mice during REM sleep and show that the activity of VIP and SST is differentially  
46 modulated during awake and sleeping whisking bouts, which may provide a neuronal substrate  
47 for internal brain representations occurring during sleep.

48

## 49 INTRODUCTION

50 The sleep-wake cycle is characterized by specific patterns of cortical activity: high amplitude,  
51 low frequency EEG activity in non-rapid eye movement (NREM) sleep and high frequency and  
52 low amplitude activity during both wake and rapid-eye movement (REM) sleep. Several  
53 hypotheses have emerged as to the function of sleep, with recent evidence pointing to its role  
54 in memory consolidation (Born et al., 2006; Girardeau et al., 2009; Vaz et al., 2020) or synaptic  
55 homeostasis, a process by which overall neuronal excitability is reduced during sleep (Tononi  
56 and Cirelli, 2009; Cirelli, 2017). Delta (1-4 Hz) and spindles (10-17 Hz) oscillations are well  
57 known hallmarks of NREM sleep supporting memory formation and consolidation (Steriade  
58 and Timofeev, 2003; Maingret et al., 2016; Ulrich, 2016; Latchoumane et al., 2017), whereas  
59 theta activity (5-9 Hz) is a marker of exploratory behavior and of REM sleep in rodents  
60 (Buzsaki, 2002; Montgomery et al., 2008; Girardeau et al., 2009). It is clear that the internal  
61 brain state, and the way sensory cortex processes information are dramatically altered during  
62 these vastly different vigilance states, but the underlying circuit mechanisms remain poorly  
63 understood.

64 Cortical networks are composed of both excitatory projection neurons and local inhibitory  
65 interneurons, which represent a sparse yet diverse family of GABAergic neurons with different  
66 morphologies and electrophysiological properties (Markram et al., 2004; Tremblay et al.,  
67 2016), and associated with distinct functional roles in local cortical circuits (Atallah et al., 2012;  
68 Gentet et al., 2012; Lee et al., 2013). Despite this diversity, three main subtypes of interneurons  
69 have been identified in the past decade: parvalbumin (PV)-containing neurons, vasoactive  
70 intestinal peptide (VIP)- and somatostatin (SST)-expressing cells. While there is accumulating  
71 evidence that pyramidal cells firing rate evolves over the time course of the sleep/wake cycle  
72 (Hobson and McCarley, 1971; Steriade et al., 2001; Watson et al., 2016; Miyawaki et al., 2019),  
73 changes in the activity of these three subtypes of interneurons is still poorly understood.

74 Recent studies have nevertheless revealed brain state-dependent modulation of neocortical  
75 interneuron firing activity in different brain regions, notably in the primary somatosensory  
76 barrel cortex (S1) during active whisking (Gentet et al., 2010, 2012; Lee et al., 2013; Muñoz et  
77 al., 2017). In the motor cortex, additional evidence points toward a vigilance state-dependent  
78 of modulation of PV neurons throughout the sleep/wake cycle (Niethard et al., 2016), while  
79 SST neurons in the frontal cortex have been shown to be strongly phase-locked to local slow  
80 waves sleep oscillations (Funk et al., 2017). In addition, multi-unit recordings, revealed changes  
81 in the firing rates of fast-spiking, putative PV cells during NREM and REM sleep in rodents

82 (Vyazovskiy et al., 2009; Vijayan et al., 2010; Watson et al., 2016; Miyawaki et al., 2019) and  
83 humans (Peyrache et al., 2011). Finally, a recent study highlighted that acetylcholine and  
84 serotonin could both directly modify firing patterns of S1 VIP neurons (Prönneke et al., 2020).

85 Here, we characterized the activity of the three main subtypes of GABAergic neurons involved  
86 in regulating the local excitatory-inhibitory balance in layer 2/3 of S1 in naturally-sleeping,  
87 head-restrained mice, using transgenic mouse lines where a red fluorophore could be expressed  
88 in genetically-identified subpopulations of GABAergic neurons (Taniguchi et al., 2011). This  
89 allowed us to record local cortical neuronal activity across the sleep/wake cycle, either by using  
90 calcium imaging, or by targeting PV, VIP and SST neurons under two-photon microscopy  
91 visual guidance (Margrie et al., 2003). Both techniques uncovered cell type- and vigilance state-  
92 specific differences in neuronal activity, and their results converge to show in both cases  
93 increased PV cell activity during NREM and REM sleep, increased VIP cell activity specifically  
94 during REM sleep, but an overall stable activity of SST neurons throughout the sleep/wake  
95 cycle. Further state-, whisking- and oscillation-dependent shifts in firing patterns and AP firing  
96 frequencies revealed the important regulatory role played by GABAergic cells throughout the  
97 various stages of the sleep/wake cycle.

## 98 MATERIALS AND METHODS

### 99 Transgenic Mice

100 Heterozygous male offsprings of GAD2-ires-Cre driver mice (010802, Jackson) crossed with  
101 Ai32 (RCLChR2 (H134R)/EYFP) reporter mice (012569, Jackson) were chosen for our  
102 experiments.

103 All animal experiments were conducted after approval by the local ethical committee of the  
104 University of Lyon and the Ministry of Science (Protocol number: Apafis #4613) in accordance  
105 with the European directive 86/609/EEC on the protection of animals used for experimental  
106 and other scientific purposes. All animals used in this study were maintained on a C57Bl6  
107 genetic background and group-housed in the vivarium under normal light cycle conditions.

108 We used heterozygous 6 – 12 weeks old male and female offsprings of either, PV-ires-Cre mice  
109 (008069, Jackson), VIP-ires-Cre (010908, Jackson) or SST-ires-Cre (013044, Jackson) driver  
110 mice crossed with Ai9 loxP-tdTomato reporter mice (007909, Jackson). 15 and 60 mice were  
111 used in total for the calcium-imaging and patch-clamp studies, respectively. Experiments were  
112 performed during the light period of the 12hr : 12hr light-dark cycle. All surgical procedures  
113 were performed under isoflurane anesthesia (4 % induction, 1.5-2 % maintenance). A s.c.  
114 injection of carprofen (5 mg / kg) and dexamethasone (0.08 mg) was administered prior to  
115 surgery to reduce pain and swelling.

116 First, animals were implanted with a light-weight head-bar allowing head-restraint under two-  
117 photon microscopy. The recording chamber was positioned above S1 barrel cortex (-2 mm  
118 posterior to bregma and -3.5 mm lateral to midline). Stainless-steel screws and wires were  
119 inserted respectively over the contralateral skull (Frontal electrode: +2 mm anterior to bregma,  
120 +2 mm lateral; parietal electrode: at -2 mm posterior to bregma, +2 mm lateral) and into the  
121 neck muscles for monitoring of EEG and EMG. The skull positions for the EEG screws were  
122 chosen to facilitate NREM sleep detection (Fang et al., 2009). After recovery from surgery,  
123 mice were habituated to the head-restraint for 3 weeks (daily sessions of increasing durations)  
124 until regular bouts of NREM and REM sleeps were detected.

125 Three days after implantation for the calcium imaging study and on the first day of recordings  
126 for the patch clamp study, mice were anesthetized with ~1.5 % isoflurane and the C2 barrel  
127 column of the primary somatosensory cortex (S1) was located on the skull using intrinsic optical  
128 imaging (Q-Imaging). In short, all whiskers contralateral to the metal head holder chamber were  
129 removed except C2. The skull thickness under the chamber was softly reduced with a dental

130 drill and a drop of ASCF was placed inside the chamber. The C2 whisker was deflected at 8  
131 Hz, with an amplitude of 5° for 5 seconds. Successive trials of stimulation were succeeding by  
132 trials with no stimulation. Images were processed and analyzed using V++ Software  
133 (DigitalOptics, Auckland, New Zealand). The evoked hemodynamic signal was imaged under  
134 red LED (610 nm) by subtracting non-stimulation trials to stimulation trials. Finally, the  
135 combination of the picture taken under white light and the one taken under red LED, allowed  
136 the targeting of C2 column position inside the chamber (Bouchard et al., 2009).

### 137 **Virus Injection**

138 For the calcium imaging study, animals were injected with a GCaMP6m  
139 (AAV1.Syn.GCaMP6m.WPRE.SV40 – Penn Vector Core) (Chen et al., 2013), under isoflurane  
140 anesthesia at 1.5-2%, following the intrinsic optical imaging session. A small craniotomy  
141 (diameter 100µm) was drilled -1mm lateral to the identified C2 column, and the pia was  
142 removed. An injection at 200-300µm depth was performed with a glass pipette inclined at 45°  
143 and filled with the virus (0.2µL / min, 2µL delivered in total).

144 At the end of the habituation period, a small craniotomy (centered on C2 column (~1 x 2 mm)  
145 was performed above the C2 barrel column. Dura mater was removed, and 1.5% agarose was  
146 applied onto the cortical surface to stabilize it. For the calcium imaging study, a cover slip of  
147 the precise dimension of the craniotomy was glued on the skull (Goldey et al., 2014). For patch-  
148 clamp experiments, an opening was left on one side of the craniotomy for pipette insertions.  
149 The exposed brain was continually immersed in ASCF. Animals were allowed to recover for at  
150 least 2-3h before recording, and recording sessions lasted up to 4h. Animals were placed on the  
151 stage of a LaVision 2-photon microscope combined with a pulsed Ti-Sapphire laser ( $\lambda= 920$   
152 nm; Chameleon; Coherent). Image and data acquisition was obtained using Inspector Pro  
153 (LaVision, Germany). Simultaneous LFP and whole-cell/cell-attached recordings were  
154 performed using glass micropipettes filled respectively with ACSF (in mM: 135 NaCl, 5 KCl,  
155 5 HEPES, 1 MgCl<sub>2</sub>, 1.8 CaCl<sub>2</sub>, 0.01 Alexa-488 (adjusted to pH 7.3 with NaOH) and internal  
156 solution (in mM: 135 potassium gluconate, 4 KCl, 10 HEPES, 10 phosphocreatine, 4 MgATP,  
157 0.3 Na<sub>3</sub>GTP, 0.01 Alexa-488 (adjusted to pH 7.3 with KOH; osmolarity adjusted to 300  
158 mOsmol).

159

160

## 161 **Calcium Imaging**

162 Images (256 x 91 pixels, 1 pixel = 1.76  $\mu\text{m}^2$ ) were acquired at a frequency of 10.12 Hz. Every  
163 recording lasted 2, 3 or 4 minutes. The recording onset was determined by the experimenter to  
164 maximize the chances of obtaining bouts of NREM, REM sleep and wakefulness. One animal  
165 could be recorded up to 15 consecutive days. A custom-made Matlab routine (Jorrit Montijn,  
166 Universiteit van Amsterdam and Mélodie Borel, Université Claude Bernard de Lyon) was used  
167 to quantify the GCaMP6-related fluorescence variations of neurons. In short, small x-y drifts  
168 were corrected with an image registration algorithm. If a substantial z-drift was detected during  
169 a session, that session was rejected and removed from further analysis. Regions of interest  
170 (neuronal somata, and neuropil) were determined semi-automatically using our custom-made  
171 Matlab software and  $\Delta F/F_0$  values for all neurons were then calculated as follows: each  
172 neuron's fluorescence (F) was normalized by the baseline fluorescence of that neuron ( $F_0$ ),  
173 taken as the mean of the lowest 50% fluorescence for that session ( $\Delta F = (F - F_0)/F_0$ ) (adapted  
174 from Goltstein et al., 2013). Neurons that were also expressing TdTomato were subsequently  
175 categorized as PV, VIP or SST cells, while all other neurons were considered to be putative  
176 excitatory pyramidal cells.

## 177 **Patch-Clamp/LFP Recordings**

178 Glass pipettes (open tip resistances: 3-4 MOhms for LFP pipettes, 4-6 MOhms for loose-patch  
179 or whole-cell patch-clamp pipettes) were lowered into the C2 column of S1 barrel cortex under  
180 positive pressure, using two micro-manipulators (Scientifica PatchStar, United Kingdom).  
181 Once a neuron of interest was identified in the field of view, the LFP pipette was positioned  
182 nearby (~ 100 – 200  $\mu\text{m}$  away). Loose-patch recordings were obtained by approaching the  
183 neuron under low pressure until the open tip resistance increased to ~100 MOhms. Whole-cell  
184 recordings were obtained by perforating the membrane through rapid suction after obtaining a  
185 gigaohm seal. Z-stack images were performed to confirm the position of the pipette tip relative  
186 to the neuron of interest. Signals were acquired at 20 kHz and low-pass Bessel filtered at 8 kHz  
187 with a Multiclamp 700 B amplifier (Molecular Devices, Axon Instruments). Spikes were  
188 automatically detected using a manually-set threshold on the derivative of the signal.

189 Oscillatory bouts (Delta waves: 1 – 4 Hz; theta oscillations: 5 - 9 Hz; Spindles: 10 – 17 Hz)  
190 were detected using scripts adapted from the Freely Moving Animal (FMA) Matlab Toolbox  
191 (developed by M. Zugaro, Collège de France). After band-pass filtering the LFP signal in the  
192 appropriate frequency range, a low-pass filtered squared envelope of the z-scored signal was



193 computed. Only bouts that crossed the threshold of  $z = 2$ , contained a peak of at least  $z = 5$  and  
194 lasted at least 250 ms and 110 ms for delta and theta oscillations respectively, were considered.  
195 Bouts were further merged if separated by less than 500ms. Finally, only episodes lasting over  
196 1 s for delta and 350 ms for theta, corresponding to a minimum of 3 oscillations per bout, were  
197 kept. Spindles were detected by filtering LFP signal between 10 and 17 Hz and the same low-  
198 pass filtered than previously described have been computed. All event has to cross a threshold  
199 of 2.5 with a minimum peak of 4. Too close events (less than 200ms) were merged. Finally,  
200 only events lasting over 500 ms and less than 3.5 s were kept. Delta events preceding spindles  
201 were manually detected after filtering the LFP signal between 0.5 to 4 Hz (minimum and  
202 maximum durations of 100 ms and 800 ms respectively). Finally, for the analysis of neuronal  
203 activity during delta-spindles bouts, the peak of the delta event was used to align all delta-  
204 spindles bouts.

205 On each detected oscillation, a Hilbert transform was applied and the phase of each spike  
206 relative to the oscillation was computed. Only cells with more than 30 spikes detected on  
207 oscillations was taken into account for this analysis. All circular statistics were performed using  
208 the Circular Statistics Toolbox developed on Matlab (Berens et al., 2009). First, a circular test  
209 (Rayleigh's test) was performed to determine if cells were significantly modulated by the  
210 oscillation ( $p < 0.01$ ). Then, a Von Mises distribution was fitted on each spike distribution of  
211 modulated cells and two parameters were extracted: the preferred phase ( $\mu$ ) and the  
212 concentration ( $\kappa$ ). The Von Mises  $\mu$  corresponds to the mean location of the peak of the  
213 distribution, while the Von Mises  $\kappa$  estimates how much the distribution is concentrated on  $\mu$ .

#### 214 **Sleep scoring and whisker tracking**

215 EEG and EMG signals were recorded at 20 kHz, amplified (AM system Inc, Model 3000  
216 AC/DC, and band-pass filtered (EEG: 0.1-100 Hz, EMG: 300-3000 Hz) for online display  
217 during recording sessions. Sleep scoring was performed manually offline with at a temporal  
218 precision of 100 ms. Parameters used to help in the identification of the three main vigilance  
219 states (Wake, NREM and REM) were EEG and EMG variance, theta/delta ratio and an ongoing  
220 FFT. Wake episodes were defined by a low EEG variance and a high EMG variance. NREM  
221 sleep bouts were determined based on a lower EMG and higher EEG variance, together with  
222 the presence of spindles on the EEG and/or the LFP. REM sleep was scored when a high  
223 theta/delta ratio was observed on the EEG, accompanied by a very low EMG variance. Episodes  
224 with undefined vigilance states, such as transitional and intermediate states or episodes lasting  
225 less than 20 s were removed from the analysis. Whisker movement was tracked with a high



226 speed (320x240 pixels; 100 Hz) camera (MotionProRedlake, USA) under infrared illumination  
227 ( $\lambda$ : 850 nm; OPT machine Vision). The angle of whisker deflection was calculated using a  
228 custom-made software written in Matlab (courtesy of P-A. Libourel). An episode of free  
229 whisking was considered as such if the C2 whisker deflection exceeded 20 degrees and  
230 contained at least three protraction-retractions exceeding 10 degrees, lasting at least 200 ms.  
231 Twitches were also detected ( $> 20$  degrees but less than three protraction-retractions exceeding  
232 10 degrees detected) and were removed from the analysis of wakefulness without whisking.  
233 Under these conditions, free whisking episodes were detected in both wake and REM sleep, but  
234 not during NREM sleep.

### 235 **Statistics**

236 All classical statistical analysis was performed using routine functions in Matlab. Normality  
237 distribution and homoscedasticity was checked on samples using the Kolmogorov-Smirnov and  
238 Levene test respectively. In each case, samples were nonparametric and medians  $\pm$  median  
239 absolute deviations are stated in the section Results. A Wilcoxon-sign ranked test and Friedman  
240 test were applied for 2-paired groups and multiple group comparison respectively (unless  
241 otherwise stated). If compared samples were considered to be independent, a Mann-Whitney  
242 test, for two group comparison, or a Kruskal Wallis test, for multiple groups comparison, were  
243 carried out. Finally, when multiple groups comparison appeared significantly different,  
244 corrected Wilcoxon-sign ranked tests and corrected Mann-Whitney tests were performed two  
245 by two for paired and independent data respectively. For patch-clamp experimental data, some  
246 neurons were only recorded in a subset of the three main vigilance states (for example,  
247 wakefulness and NREM sleep, but not REM sleep). Therefore, samples were analyzed with a  
248 linear mixed-effects model (*LMM*) on R studio using LME4 package and Satterthwaite  
249 approximation (Bates et al., 2015). For a better fit to data, repeated measurements were  
250 included. In this case, the estimate means and standard errors, computed by Kenward-Roger  
251 approximation, are stated in the section Results. All statistical significances are represented by  
252 asterisks: \* for  $p < 0.05$ , \*\* for  $p < 0.01$ , \*\*\* for  $p < 0.001$ .

253

254

## 255 RESULTS

### 256 Cell-specific and vigilance state-dependent calcium activity throughout the sleep-wake 257 cycle

258 We first investigated how the activity of excitatory and inhibitory neurons might evolve  
259 throughout the sleep-wake cycle using *in vivo* two-photon calcium imaging. Transgenic mice  
260 expressing Cre tdTomato in either PV, VIP or SST cells, were injected with a calcium indicator  
261 (AAVsyn-GCaMP6m), allowing us to specifically identify and measure fluorescence changes  
262 in both interneurons and putative pyramidal cells in layers 2/3 of S1 barrel cortex (Fig. 1A, B).  
263 In total, 2338 putative pyramidal (ie: neurons unlabeled with TdTomato), 310 PV, 113 VIP,  
264 184 SST cells were recorded but only 1206 putative pyramidal, 164 PV, 78 VIP and 134 SST  
265 were recorded in all three main vigilance states of the sleep-wake cycle and considered for  
266 analysis (Wake, NREM sleep and REM sleep, n = 15 mice). Overall, we observed subtype-  
267 specific changes in activity throughout the different vigilance states (Fig. 1C). Notably, PV  
268 activity increased during sleep stages compared to wake ( $\Delta F/F_0$ : Wake:  $11.9 \pm 8.0$  %; NREM:  
269  $18.1 \pm 9.1$  %; REM:  $20.2 \pm 10.6$  %, n = 164; p < 0.001 for Wake vs NREM and Wake vs REM)  
270 and the activity of VIP cells was significantly larger in REM sleep compared to NREM ( $\Delta F/F_0$ ,  
271 Wake:  $37.4 \pm 22.9$  %; NREM:  $25.6 \pm 14.3$  %; REM:  $57.1 \pm 34.9$  %, n = 78; p < 0.001 for  
272 NREM vs REM). The average activity of both putative PYR and GABAergic SST neurons  
273 remained however unchanged throughout the sleep-wake cycle (Fig. 1C, D). Subdividing the  
274 population of PYR neurons into sextiles based on their average activity during wake revealed  
275 a larger activity variance during REM compared to wake and NREM sleep ( $\sigma$ : Wake = 70.1,  
276 NREM = 70.6, REM = 79.7, *Levene's test* p < 0.001, Fig. 1D). This observation prompted us  
277 to separate PYR neurons into two groups based on their average activity during REM sleep.  
278 High REM activity PYR displayed significantly lower activity in wake and NREM sleep  
279 ( $\Delta F/F_0$ , Wake:  $52.2 \pm 28.3$  %; NREM:  $47.3 \pm 25.1$  %; REM:  $71.2 \pm 27.0$  %, n = 603; p < 0.001  
280 for both Wake vs REM and NREM vs REM) whereas low REM activity PYR cells showed  
281 increased wake and NREM activity ( $\Delta F/F_0$ , Wake:  $25.3 \pm 11.6$  %; NREM:  $25.3 \pm 11.1$  %;  
282 REM:  $18.3 \pm 7.5$  %, n = 603; p < 0.001 for both Wake vs REM and NREM vs REM) (Fig. 1E).  
283 Furthermore, the average wake and NREM activity of high REM activity PYR cells was larger  
284 than their low REM activity counterparts (*Mann-Whitney test*, p < 0.001) (Fig. 1E).

285 Next, we decided to examine the dynamics of calcium activity around vigilance state  
286 transitions. Transitions between vigilance states were manually detected and aligned at t = 0 s

287 (Fig. 1F). Awakenings from both NREM and REM sleep stages provide a good temporal  
288 resolution through abrupt increases in EMG activity. While the transition between NREM and  
289 REM sleep is often considered progressive, we were able, in some instances, to time-stamp  
290 such transitions when clear theta waves began to appear on the EEG, concomitant with a rapid  
291 reduction in EMG activity and the appearance of heartbeats (Fig. 1F). The mean calcium  
292 activity between  $-10$  to  $0$  s from the transition was compared to the activity between  $0$  to  $+10$   
293 s. We found that calcium activity of PV and VIP cells decreased and increased respectively at  
294 NREM to wake onsets (PV: NREM to Wake transitions:  $15.1 \pm 11.1$  % vs  $10.4 \pm 8.2$  %,  $n =$   
295  $217$  cells,  $p < 0.001$ ; VIP: NREM to Wake transitions:  $16.0 \pm 14.5$  % vs  $26.6 \pm 19.6$  %,  $n = 75$   
296 cells,  $p = 0.004$ ). In addition, PV neurons activity also decreased at wake onset after a REM  
297 episode while VIP cell calcium fluorescence increased at REM onset (PV: REM to Wake  
298 transitions:  $9.3 \pm 15.3$  % vs  $-1.3 \pm 12.3$  %,  $n = 161$  cells,  $p < 0.001$ ; VIP: NREM to REM  
299 transitions:  $16.8 \pm 22.5$  % vs  $39.0 \pm 40.3$  %,  $n = 58$  cells,  $p = 0.003$ ) (Fig. 1F). There was no  
300 change in calcium fluorescence in SST neurons and in both groups of PYR cells around any  
301 considered state. Taken together, our results suggest that changes in vigilance states occurring  
302 throughout the sleep-wake can rapidly alter circuit dynamics through PV and VIP cells of layer  
303 2/3 S1 barrel in naturally-sleeping head-fixed mice.

#### 304 **Vigilance state-dependent modulation of GABAergic neurons firing activity**

305 While the dynamics of calcium fluorescence across the sleep-wake cycle are a good indicator  
306 of overall activity changes, their temporal resolution remains limited. In order to better  
307 understand the circuit activity changes induced by different brain vigilance states, we next  
308 performed targeted loose- and whole-cell patch-clamp recordings of genetically-identified PV,  
309 VIP and SST neurons, as well as putative excitatory pyramidal cells under two-photon  
310 microscopy (PV loose-patch  $n = 32$ , whole-cell  $n = 3$ ; VIP loose-patch,  $n = 31$ , whole-cell  $n =$   
311  $3$ ; SST loose-patch  $n = 32$ , whole-cell  $n = 5$  including one silent; PYR loose-patch  $n = 18$ ,  
312 whole-cell  $n = 4$  including one silent; Fig. 2A, B), while simultaneously recording the local field  
313 potential (LFP) with a second glass pipette positioned in layer 2/3 of the C2 barrel column. In  
314 the next section, estimated means  $\pm$  estimated standard errors of mean are stated and firing  
315 activity was compared over the three vigilance states using LMM (see Methods).

316 AP firing activity of PV cells increased in NREM compare to wake ( $p < 0.001$ ) and increased  
317 in REM sleep compared to both wake ( $p < 0.001$ ) and NREM ( $p = 0.003$ ) (Wake:  $15.0 \pm 3.0$   
318 Hz,  $n = 34$ ; NREM:  $25.0 \pm 3.0$  Hz,  $n = 35$ ; REM:  $29.0 \pm 3.2$  Hz,  $n = 31$ ; LMM) (Fig. 2C). Firing  
319 rates of VIP cells significantly increased during REM sleep compared to NREM ( $p = 0.002$ ),

320 mirroring our results found under calcium-imaging (Wake:  $11.9 \text{ Hz} \pm 1.4$ ,  $n = 31$ ; NREM:  $10.9$   
321  $\text{Hz} \pm 1.4$ ,  $n = 31$ ; REM:  $13.3 \text{ Hz} \pm 1.5$ ,  $n = 28$ ; *LMM*). Finally, the AP firing activity of SST  
322 cells remained unchanged overall across vigilance states. For PYR neurons, we split our  
323 populations into two groups as previously described, after removing a subset of cells that were  
324 not recorded during REM sleep ( $n = 18$  cells). On average, high REM activity PYR were less  
325 active in wake compared to NREM and REM (Wake:  $3.1 \pm 0.6 \text{ Hz}$ ,  $n = 9$ ; NREM:  $4.9 \pm 0.7$   
326  $\text{Hz}$ ,  $n = 9$ ; REM:  $6.8 \pm 0.9 \text{ Hz}$ ,  $n = 9$ ,  $p < 0.001$  for Wake vs NREM,  $p < 0.001$  for Wake vs  
327 REM,  $p = 0.007$  for REM vs NREM; *LMM*) while low REM activity PYR cells did not display  
328 any significant changes in overall AP firing activity across vigilance (Fig. 2C). The activity of  
329 these two subgroups of PYR neurons was also consistently significantly different across all  
330 vigilance states (*Mann-Whitney test*  $p < 0.001$  for Wake, NREM and REM) (Fig. 2C). Taken  
331 together, these findings are consistent with our calcium activity results (Fig. 1), and confirm  
332 that PV cells activity increases during NREM and REM sleep compared to wake, that VIP  
333 activity specifically increases during REM sleep compared to NREM, and that SST neuronal  
334 activity is overall not affected by the different stages of the sleep-wake cycle.

335

336 As for our calcium-imaging study, we were able to manually time-stamp clear transition points  
337 between vigilance states, both at wake onset, but also between NREM and REM sleep in some  
338 instances. Therefore, we investigated the dynamics of AP firing rates of different neuronal cell  
339 types around those transition time points (aligned at  $t = 0 \text{ s}$ ) (Fig. 2D). We quantified and  
340 compared firing rates from  $-5 \text{ s}$  to  $0 \text{ s}$  and from  $0$  to  $+5 \text{ s}$ . Confirming the results we found under  
341 calcium-imaging, a rapid decrease in PV cell firing was observed at wake onset from either  
342 NREM or REM sleep (NREM to Wake transitions:  $8.5 \pm 5.2 \text{ Hz}$  vs  $1.0 \pm 1.0 \text{ Hz}$ ;  $n = 32$ ,  $p <$   
343  $0.001$ ; REM to Wake transitions:  $12.7 \pm 9.2 \text{ Hz}$  vs  $2.0 \pm 1.2 \text{ Hz}$ ;  $n = 30$ ,  $p < 0.001$ ; *LMM*) and  
344 no changes in the firing rate of SST cells and PYR low REM activity were observed around  
345 transitions. However, we did not observe any fast changes in VIP cells firing across states  
346 transitions. Finally, firing rates of PYR high REM activity cells decreased significantly as soon  
347 as the mice woke up, which was not revealed by calcium imaging data (NREM to Wake  
348 transitions:  $2.3 \pm 0.7 \text{ Hz}$  vs  $1.5 \pm 2.3 \text{ Hz}$ ;  $n = 9$ ,  $p = 0.04$ ; REM to Wake transitions:  $2.0 \pm 3.0$   
349  $\text{Hz}$  vs  $0.0 \pm 4.0 \text{ Hz}$ ;  $n = 9$ ,  $p = 0.016$ ; *LMM*).

350 While cortical neurons are often classified as bursty on non-bursty on the basis of a clear  
351 bimodality in their firing ISIs (Peyrache et al., 2011), we observed that most of our recorded  
352 interneurons could fire at both high and low frequency regimes throughout the sleep-wake

353 cycle, as previously observed for other neuronal types, for example in the thalamus (Urbain et  
354 al., 2019). In particular, high frequency bursts can strongly modulate synaptic integration and  
355 could therefore increase information content (Lisman, 1997). Therefore, we chose to investigate  
356 whether GABAergic and putative excitatory neurons firing patterns changed throughout the  
357 sleep-wake cycle by focusing on high-frequency bursts firing, defined as any instance of an  
358 instantaneous firing frequency (IFF) falling above 100 Hz for VIP, SST and PYR neurons, or  
359 rising above 200 Hz for PV cells (Fig. 2E). For this analysis, only episode containing more than  
360 30 spikes were taken into account. On average, the proportion of high frequency bursts in PV  
361 and VIP neurons increased in both NREM and REM sleep compared to wake (PV, Wake:  $19.6$   
362  $\pm 3.4\%$ ,  $n = 34$ ; NREM:  $23.2 \pm 3.4\%$ ,  $n = 35$ ; REM:  $23.1 \pm 3.5\%$ ,  $n = 31$ ;  $p < 0.001$  between  
363 Wake and NREM,  $p = 0.018$  for Wake vs REM; VIP, Wake:  $24.2 \pm 3.8\%$ ,  $n = 31$ ; NREM:  $27.5$   
364  $\pm 3.8\%$ ,  $n = 31$ ; REM:  $27.9 \pm 3.9\%$ ,  $n = 28$ ;  $p < 0.001$  for Wake vs NREM,  $p = 0.008$  for Wake  
365 vs REM; *LMM*). In contrast, SST cells, as well as PYR neurons with high REM activity,  
366 displayed a more bursting mode specifically in NREM sleep compared to wake (SST Wake:  
367  $10.9\% \pm 3.9$ ,  $n = 29$ ; NREM:  $17.1 \pm 3.9\%$ ,  $n = 30$ ; REM:  $13.5 \pm 4.1\%$ ,  $n = 26$ ;  $p < 0.001$  for  
368 Wake vs NREM; High REM PYR, Wake:  $17.3 \pm 6.6\%$ ; NREM:  $23.2 \pm 6.6\%$ ; REM:  $17.9 \pm$   
369  $7.2\%$ ,  $n = 9$ ;  $p = 0.01$  between Wake and NREM; *LMM*) (Fig. 2F, G). On the other hand, PYR  
370 neurons with low REM activity, showed a significant increase in their bursting behavior in  
371 NREM and further more during REM sleep (Low REM PYR, Wake:  $1.0 \pm 0.5\%$ ; NREM:  $1.3$   
372  $\pm 0.5\%$ ; REM:  $1.7 \pm 0.5\%$ ,  $n = 9$ ;  $p = 0.01$  between Wake and NREM,  $p < 0.001$  for Wake vs  
373 REM;  $p = 0.002$  for NREM vs REM; *LMM*) (Fig. 2G). These observed shifts in high-frequency  
374 bursts firing may be related to changes in the firing irregularity of neurons. To quantify this  
375 parameter, we calculated the local coefficient of variation (LV) for which an LV of 1, more  
376 than 1 or less than 1, indicates Poisson-like, irregular and regular firing respectively (Vinck et  
377 al., 2016) (Fig. 2H). Interestingly, we found that LV firing irregularity was vigilance-state and  
378 cell-type specific. PV firing was significantly more irregular in wake, while VIP firing was  
379 more irregular in NREM sleep (PV, Wake:  $0.97 \pm 0.05$ ,  $n = 34$ ; NREM:  $0.92 \pm 0.05$ ,  $n = 35$ ;  
380 REM:  $0.86 \pm 0.052$ ,  $n = 31$ ,  $p < 0.001$  for both Wake vs NREM and Wake vs REM and NREM  
381 vs REM; VIP, Wake:  $0.87 \pm 0.06$ ,  $n = 31$ ; NREM:  $0.98 \pm 0.06$ ,  $n = 31$ ; REM:  $0.95 \pm 0.07$ ,  $n =$   
382  $28$ ,  $p < 0.001$  for NREM vs Wake; *LMM*) and SST cells displayed the same firing pattern across  
383 vigilance state (Fig. 2I). In contrast, the firing irregularity of PYR low REM activity increased  
384 significantly in REM sleep compared to wake and NREM (Low REM PYR: Wake:  $0.8 \pm 0.2$ ;  
385 NREM:  $0.9 \pm 0.2$ ; REM:  $1.4 \pm 0.2$ ,  $n = 9$ ;  $p = 0.01$  for Wake vs REM;  $p = 0.03$  for NREM vs

386 REM; *LMM*), while firing pattern of high REM PYR neurons remained unchanged across all  
387 vigilance states (Fig. 2J).

### 388 **Theta and delta oscillations modulate timing of interneuronal firing**

389 We observed a variety of oscillations on the layer 2/3 LFP recorded via a glass pipette  
390 positioned nearby. LFP cortical oscillations in the theta band (5-9 Hz) have been previously  
391 observed during both wakefulness and REM sleep, but not during NREM sleep (Montgomery  
392 et al., 2008; Del Vecchio Koike et al., 2017). Interestingly, we could also distinguish prominent  
393 theta oscillations during REM sleep on our layer 2/3 LFPs, although the LFP electrode is usually  
394 positioned in deeper layers (Fig. 3C). We therefore decided to investigate phase locking of local  
395 interneurons and putative pyramidal cells to layer 2/3 LFP theta oscillations detected in wake  
396 and REM sleep (Fig. 3A - C). First, we estimated that 58% and 48 % of PV cells were  
397 significantly modulated by theta in wake and REM respectively (Rayleigh test, see Methods),  
398 60 % and 43 % of VIP cells, 41 % and 16 % of SST cells, and 47 % and 44 % of PYR neurons  
399 (Fig. 3D). Fits using von Mises functions yielded estimates of the preferred phase ( $\mu$ ) and the  
400 concentration ( $\kappa$ ) of spiking (which represents how peaked the spiking distribution is around  
401 the preferred phase – See Methods) (Fig. 3B). Interestingly, all recorded cells seems to fire at  
402 the trough of the theta oscillation, regardless of their neuronal identities and the vigilance state  
403 (Fig. 3E, F). On the other hand, the median concentration parameter  $\kappa$  of PV cells during wake  
404 remained higher than the one obtained during REM sleep ( $p = 0.03$ ) while the median  $\kappa$  was  
405 similar for the other cells in both wake and REM sleep (PV  $\kappa$ : Wake:  $0.88 \pm 0.2$ ,  $n = 19$ ; REM:  
406  $0.54 \pm 0.15$ ,  $n = 14$ , *corrected Mann-Whitney test*) (Fig. 3E, G).

407 LFP delta oscillations (1-4 Hz) could be observed in all vigilance states, including REM sleep  
408 (Funk et al., 2016), although they have been shown to be mostly prominent during wakefulness  
409 (Fernandez et al., 2017) and to be interspersed with slow-wave activity during NREM sleep  
410 (Crunelli et al., 2006) (Fig. 3H). We observed that about 70 % of PV cells were modulated by  
411 delta oscillations in wake, NREM and REM (67 %, 76 % and 76 % respectively). A similar  
412 proportion of VIP neurons (68 %, 69 % and 68 % for Wake, NREM and REM respectively) but  
413 a smaller proportion of SST and PYR cells (SST, 39 %, 40 % and 44 %; PYR, 64 %, and 50 %  
414 and 56 % for Wake, NREM and REM sleep respectively) were phase-modulated by ongoing  
415 delta activity (Fig. 3I).

416 Similarly to what we observed for oscillations in the theta band, we found no difference  
417 amongst modulated cells of any cell type for the position of the peak of the preferred delta phase



418 across all vigilance states (Fig. 3J, K). On average, the median concentration median parameter  
419  $\kappa$  was also unchanged for all cell types across all vigilance states (Fig. 3J, L).

#### 420 **Interneurons activity are differentially modulated by spindles**

421 Importantly, we were able to observe clear spindle oscillations during NREM sleep (Fig. 4A).  
422 First we investigated whether detected spindles (10 – 17 Hz, see Methods) during NREM sleep  
423 modulated the activity of different cortical neurons of S1 barrel layer 2/3. The firing rates of  
424 different neuronal subtypes were estimated when spindles occur (Spdl +), and when no spindles  
425 were detected on the LFP (Spdl -). On average, firing rates of both PV and PYR cells increased  
426 during spindles compared to outside spindles, while the AP activity of SST cells decreased  
427 during spindles (PV, Spdl-:  $17.1 \pm 9.9$  Hz; Spdl+:  $21.7 \pm 12.6$  Hz;  $n = 35$ ,  $p < 0.001$ ; PYR, Spdl-  
428 :  $1.5 \pm 1.3$  Hz; Spdl+:  $2.1 \pm 2.1$  Hz;  $n = 22$ ,  $p = 0.010$ ; SST, Spdl-:  $3.2 \pm 3.2$  Hz; Spdl+:  $2.8 \pm$   
429  $2.8$  Hz;  $n = 37$ ,  $p = 0.0017$ ). In contrast, median firing rates of VIP cells remained unchanged  
430 by the occurrence of spindle (Fig. 4B).

431 We next investigated whether neurons could phase-lock to spindles by performing a Rayleigh  
432 test that allowed us to determine whether spiking of individual neurons was significantly locked  
433 to a particular phase of a spindle oscillation. A majority (55.9 %) of PV cells were phase-  
434 modulated by spindles, as 50.0 % of PYR and 41.4 % of VIP neurons, while only 18.2 % of  
435 SST neurons were (Fig. 4C). The position of the peak of the preferred phase in radians (rad)  
436 was significantly different for VIP cells compared to PV ( $p = 0.01$ ) and PYR ( $p = 0.003$ ) ( $\mu$ ,  
437 PV:  $-0.05 \pm 0.09$  rad; VIP:  $0.08 \pm 0.14$  rad; PYR:  $-0.11 \pm 0.06$  rad; *corrected Mann-Whitney*  
438 *test*) (Fig. 4E). Indeed, VIP cells discharged 1.2 ms to 2.1 ms after PV neurons and 1.8 ms to  
439 3.0 ms after PYR cells on spindles oscillation (for 10 and 17 Hz spindles respectively). On the  
440 other hand, the median concentration parameter  $\kappa$  of PYR cells was higher than the median  $\kappa$   
441 of VIP cells (PYR  $\kappa$  :  $1.03 \pm 0.4$ ; VIP  $\kappa$  :  $0.44 \pm 0.26$ ;  $p = 0.04$ ; *corrected Mann-Whitney test*)  
442 (Fig. 4F).

443 In some instances (around 2 %, range: 0 – 18 %), LFP spindles bouts were preceded by a large  
444 positive delta wave (1-4 Hz), as previously observed on deeper S1-barrel cortex LFPs during  
445 NREM (Urbain et al., 2019) (Fig. 4A). These delta waves are thought to correspond to periods  
446 of cortical quiescence (Contreras and Steriade, 1995; Maingret et al., 2016). We quantified  
447 normalized firing rates before, during delta events when they occurred (Delta), and during  
448 spindles (Spdl) and examined how the presence or absence of such delta waves influenced their  
449 dynamics. On average, all neuronal subtypes displayed increased firing rates during spindles



450 compared to delta events (PV, Before:  $15.0 \pm 7.2$  Hz; Delta:  $7.5 \pm 7.5$  Hz Spdl:  $28.3 \pm 16.5$  Hz;  
451  $n = 14$ ,  $p < 0.001$  between Delta and Spdl; VIP, Before:  $9.0 \pm 5.5$  Hz ; Delta:  $10.0 \pm 5.0$  Hz;  
452 Spdl:  $17.6 \pm 6.7$  Hz;  $n = 12$ ,  $p = 0.02$  between Before and Spdl,  $p = 0.004$  between Delta and  
453 Spdl; SST, Before:  $1.1 \pm 1.1$  Hz; Delta:  $0.0 \pm 0.0$ ; Spdl:  $3.9 \pm 3.9$ ;  $n = 12$ ; PYR, Before:  $0.0 \pm$   
454  $0.0$  Hz; Delta  $0.0 \pm 0.0$  Hz; Spdl:  $3.8 \pm 3.8$  Hz;  $n = 9$ ,  $p = 0.02$  between Delta and Spdl) (Fig.  
455 4H). Interestingly, the overtime analysis showed us that the increase activity of VIP cells  
456 specifically appears at the end of the delta event (Fig. 4G).

457 We then wondered whether the neuronal activity could differ during a spindle, depending on  
458 whether or not it was preceded by a delta event. Results showed that all neuronal cell types -  
459 except SST cells, displayed a stronger firing rate during spindles preceded by a delta event (PV,  
460 Spdl:  $13.1 \pm 5.0$  Hz Delta-Spdl:  $28.3 \pm 16.5$  Hz;  $n = 14$ ,  $p = 0.013$ ; VIP, Spdl:  $10.8 \pm 5.1$  Hz;  
461 Delta-Spdl:  $17.6 \pm 6.7$  Hz;  $n = 12$ ,  $p < 0.001$ ; PYR, Spdl:  $0.9 \pm 0.9$  Hz; Delta-Spdl:  $3.8 \pm 3.8$   
462 Hz;  $n = 9$ ,  $p = 0.03$ ) (Fig. 4I).

463

#### 464 **Whisking episodes can occur during REM sleep**

465 One of the most striking behavioral features of rodents, which they mainly display during  
466 exploration of their environment, is their ability to actively sweep their whiskers back and forth  
467 (Welker, 1964). Interestingly, we observed long-lasting ( $> 1$  s) C2 whisker movements during  
468 both active wakefulness and throughout the time course of REM sleep episodes (Fig. 5A). Those  
469 bouts were not equally distributed over the time course of a wake nor REM episode, occurring  
470 over longer periods of time at the start of a wake episode and towards the end of a REM episode,  
471 respectively (Wake % time spent whisking, 1<sup>st</sup> part:  $9.8 \pm 8.3$  %; 2<sup>nd</sup> part:  $4.5 \pm 8.7$ %; 3<sup>rd</sup> part  
472  $1.5 \pm 5.4$  %;  $n = 92$ ,  $p = 0.003$  for 1<sup>st</sup> vs 2<sup>nd</sup> part,  $p < 0.001$  for 1st vs 3<sup>rd</sup> part;  $p < 0.001$  for 2<sup>nd</sup>  
473 vs 3<sup>rd</sup> part; REM % time spent whisking, 1<sup>st</sup> part:  $0.0 \pm 4.6$  %; 2<sup>nd</sup> part:  $3.6 \pm 8.8$  % ; 3<sup>rd</sup> part  $6.2$   
474  $\pm 3.6$  %;  $n = 70$ ,  $p < 0.001$  for 1<sup>st</sup> vs both 2<sup>nd</sup> and 3<sup>rd</sup> parts) (Fig. 5B). Whisking bouts in REM  
475 further differed from their wake counterparts in their frequency of protraction/retraction  
476 oscillations, with faster but smaller amplitude series of sweeps superimposed over an already  
477 large baseline deflection angle of the C2 whisker occurring during NREM sleep (Peak at around  
478 8 Hz for whisking bouts occurring during wake vs a peak at around 15 Hz for whisking bouts  
479 occurring during REM sleep, Fig. 5A, C), and their median maximal amplitudes (Wake:  $46.2 \pm$   
480  $8.1$  °;  $n = 92$ ; REM:  $32.8 \pm 5.5$  °;  $n = 70$ ,  $p < 0.001$ ) (Fig. 5D). However, their durations were  
481 similar to those occurring during wake (Whisking bouts duration, Wake:  $1.85 \pm 0.97$  s;  $n = 92$ ;

482 REM:  $1.76 \pm 1.76$  s,  $n = 70$ ) (Fig. 5D). Mice therefore display whisking bouts with specific  
483 characteristics during REM sleep, but their durations preclude them from being categorized as  
484 twitches (Tiriac et al., 2012).

485

## 486 **Whisking induces changes in interneuronal firing activity during both wake and REM** 487 **sleep**

488 Previous studies uncovered differential modulations of GABAergic cells neuronal firing during  
489 free whisking (Gentet et al., 2010, 2012; Muñoz et al., 2017) or active tactile behavior (Yu et  
490 al., 2019). Since we observed whisking behavior in our head-restrained, naturally-sleeping  
491 mice, during both wake and REM sleep, we next examined whether it could differentially affect  
492 neuronal firing rates in our population of layer 2/3 cortical neurons during these two  
493 fundamentally different cognitive brain states (Fig. 6). We quantified the average firing rates of  
494 different cellular subtypes when the mouse was whisking (Wh+) versus when no whisking  
495 occurred (Wh-). Furthermore, twitches were excluded from the analysis (see Methods). We  
496 observed different pattern of activity across different cells in both loose-patch (Fig. 6A) and  
497 whole-cell patch-clamp (Fig. 6B) configurations. On population data, AP firing in both PV and  
498 PYR neurons was not modulated by whisking bouts occurring during either wake nor REM  
499 sleep. On the other hand, VIP cells firing activity was increased during whisking in both wake  
500 and REM sleep (Wake Wh-:  $9.4 \pm 6.1$  Hz; Wake Wh+:  $19.0 \pm 9.9$  Hz;  $n = 28$ ; REM Wh-:  $10.7$   
501  $\pm 5.4$  Hz; REM Wh+:  $13.4 \pm 6.3$  Hz;  $n = 23$ ,  $p < 0.001$  for whisking effects in Wake,  $p = 0.01$   
502 for whisking effects in REM). In contrast, SST cells significantly decreased their AP firing  
503 whisking in wake (Wake Wh-:  $4.0 \pm 3.2$  Hz; Wake Wh+:  $3.2 \pm 3.0$  Hz;  $n = 27$   $p = 0.02$ ) and  
504 also tend to decrease during whisking bouts in REM sleep (REM Wh-:  $6.3 \pm 5.4$  Hz; REM  
505 Wh+:  $4.9 \pm 4.9$  Hz;  $n = 15$ ) (Fig. 6C). These results on population averages may not however  
506 reflect the behavior of individual neurons during whisking throughout the sleep-wake cycle.  
507 Therefore, in order to better understand whether whisking could differentially affect the firing  
508 rates of different neurons, we subtracted individual neuronal firing rates during whisking by the  
509 firing rates during non-whisking, divided by the firing rate during non-whisking, to obtain an  
510 index as a % change for each cell. We defined cells as a whisker-active (Wh+) or whisker-  
511 inhibited (Wh-) when the absolute percentage of change exceeded +15 % and -15 %,   
512 respectively. Half of PV cells were inhibited during whisking in wakefulness (53 %) while 29%  
513 were activated. During REM sleep however, PV neurons activity remained for half of them  
514 unchanged (53 %). In contrast, in both wake and REM sleep, a big majority of VIP cells

515 displayed an increased firing rate when whisking was observed (83 % and 67 % respectively)  
516 and only a small part of VIP neurons were inhibited (11 % and 22 % respectively). (Fig; 6D).  
517 In other hand, most of SST neurons are inhibited by whisking in wake and REM sleep (56 %  
518 and 44 % respectively), such as PYR cells (67 % and 78 % respectively). (Fig; 6D). Finally, we  
519 compared the percentages change in wake and REM for each individual neuron grouped by  
520 subtype. Thanks to this analysis, we were able to know if one specific neuron adopted a  
521 different firing rate modulation in wake compared to REM sleep. In our population of VIP cells,  
522 this percentage change dropped significantly in REM compared to wake, indicating that the  
523 increase in VIP cells AP firing that occurs during whisking in wake is larger than the increase  
524 observed during REM sleep (VIP Wake % change:  $+78.5 \pm 69.4$  % vs  $+22.7 \pm 23.6$  % in REM;  
525  $n = 18$ ,  $p = 0.01$ ). For PV, PYR and SST cells, the percentage changes remained stable on  
526 average in wake compared to REM (Fig. 6E). In summary, VIP cells population is mostly  
527 homogeneous, with a strong increased activity during whisking in wake and a smaller one  
528 during REM sleep, while PV, SST and PYR neurons display a more heterogeneous pattern.

## 529 **DISCUSSION**

530 Cortical activity throughout the sleep/wake cycle needs to be highly dynamic, in order to  
531 perform different behavioral tasks during wakefulness and allow the consolidation or removal  
532 of unnecessary memory traces during sleep (Kay and Frank, 2019). Local GABAergic  
533 interneurons can efficiently control the spike timing of principal neurons via their precise  
534 targeting of different regions of the somato-dendritic arborizations of pyramidal cells (Gentet,  
535 2012). Layer 2/3 of the somatosensory barrel cortex (wS1) is involved in the processing of  
536 whisker sensory information and can perform computations of both simple and complex tasks  
537 in a goal-oriented manner (Petersen, 2019). While PV cells primarily exert perisomatic  
538 inhibition onto excitatory cells (Kawaguchi and Kubota, 1997), SST cells, comprised  
539 essentially of Martinotti-type neurons (Jiang et al., 2015) control the dendritic encoding of  
540 synaptic inputs in the somatosensory cortex (Murayama et al., 2009; Gentet et al., 2012). How  
541 local GABAergic inhibitory cells regulate this circuit during different vigilance states of the  
542 sleep/wake cycle, and how ongoing brain oscillations or whisking behaviors modulate their  
543 firing patterns or activity, remains however poorly understood.

544 In this study, we first performed calcium-imaging of neuronal population activity in layer 2/3  
545 of wS1 in different transgenic mouse lines where genetically-identified subpopulations of  
546 GABAergic neurons could be visualized. This initial study first revealed that PV cell activity  
547 is increased during both NREM and REM sleep stages, VIP activity is increased specifically  
548 during REM sleep, and SST and PYR neuronal activity remains overall stable over the time  
549 course of the sleep/wake cycle. These findings share both similarities and differences with a  
550 previous study in the motor cortex, showing elevated PV cell activity during REM, but reduced  
551 activity of PV, SST and PYR neurons during NREM compared to wakefulness (Niethard et al.,  
552 2016). Such discrepancies could be explained by differences in the brain region under  
553 investigation, or experimental procedures. In our study, mice were habituated to the head-  
554 fixation device for considerably longer periods of time than in the study by Niethard and  
555 Colleagues (3 weeks in the present study versus one day before imaging sessions began). Our  
556 animals might therefore have displayed reduced levels of stress from the head-restraint during  
557 imaging sessions. In any case, our results under calcium-imaging were confirmed by our  
558 targeted recordings of individual neurons in loose-patch or whole-cell patch-clamp  
559 configurations. Such recordings also offer the advantage of a more precise temporal resolution  
560 of AP firing than calcium-imaging, and allowed us to simultaneously record the LFP by placing  
561 a glass pipette within layer 2/3 of the same column from which our targeted single-unit

562 recordings originated (Perrenoud et al., 2016). Using this combination of recording elements,  
563 we first confirmed our findings that overall activity of PV cells is significantly increased in both  
564 NREM and REM sleep compared to wake, and that VIP cells are specifically more active during  
565 REM sleep. These measures of cell type-specific average firing activity according to vigilance  
566 states offer a good indicator that the excitatory/inhibitory balance is highly dynamic across the  
567 sleep/wake cycle. In our study, we further investigated those dynamics along transitions  
568 between vigilance states and we found that PV activity rapidly decreased at wake onset from  
569 NREM and REM sleep episodes, as previously reported for transitions from NREM to wake  
570 for fast-spiking, putative PV neurons in the mouse frontal cortex (Miyawaki et al., 2019). This  
571 rapid decrease could be due to the rapid activation of the ascending arousal system. For  
572 example, wake-specific histaminergic neurons of the tuberomamillary nucleus and  
573 norepinephrine neurons of the locus ceruleus, both with extensive projections throughout the  
574 cerebral cortex, have been shown to rapidly activate at wake onset (Takahashi et al., 2006,  
575 2010).

576 Notably, we found that distribution of pyramidal cell activity broadened during REM sleep as  
577 described by Miyawaki et al. (2019). We therefore decided to split pyramidal cell population  
578 into two subgroups on the basis of their basal activity during REM. While activity at the  
579 population level remained stable across vigilance states, this separation uncovered subtler  
580 changes in the activity of principal neurons throughout the sleep/wake cycle. The neurons with  
581 the highest basal levels of REM activity were significantly less active during wake and NREM  
582 sleep, while neurons with low REM activity did not display any significant overall changes in  
583 AP firing frequency across vigilance states.

584 Interestingly, while the average AP activity of SST neurons remained stable across the  
585 sleep/wake cycle, their firing patterns, as well as those of other types of interneurons, shifted to  
586 a more burst-like behavior during NREM sleep compared to wake. This shift could be explained  
587 by the more synchronized state of cortex during NREM sleep, with the time windows for  
588 neuronal firing being temporally-restricted for all neurons compared to wake. However, the  
589 firing irregularity of GABAergic neurons was differentially modulated during NREM sleep,  
590 with increased firing irregularity being present in VIP neurons but not PV nor SST cells. Thus,  
591 VIP neurons may play a major role in the re-organization of GABAergic neuronal activity patterns  
592 during NREM, through its strong disinhibitory influence over local cortical interneurons  
593 (Pfeffer et al., 2013). The important role of VIP neurons firing dynamics during NREM was  
594 further evidenced by their firing behavior during sequences of delta waves-spindles. Delta

595 waves preceding spindles have recently been shown to play a role in memory consolidation via  
596 the recruitment of local cell assemblies performing isolated cortical computations (Todorova  
597 and Zugaro, 2019). Interestingly, we observed subtle temporal changes in the activity of  
598 GABAergic VIP neurons over the time course of LFP delta – spindles sequences that suggest  
599 that the disinhibitory control exerted by this interneuronal subpopulation is reduced during delta  
600 events, but rises quickly towards the end, and at the time of emergence of spindle oscillations  
601 (Fig. 6 H). This could lead to short, but temporally precise time windows, during which removal  
602 of inhibition onto excitatory cell assemblies would allow cortical replay sequences to be carried  
603 out (Ji and Wilson, 2007).

604 During NREM sleep, we further found an increased activity during periods of LFP spindles in  
605 both PV and excitatory layer 2/3 pyramidal neurons, but a decrease in SST overall neuronal  
606 activity, as previously reported across different cortical regions (Niethard et al., 2018). In  
607 addition, we report that amongst neurons that were modulated by spindle oscillations, PV and  
608 pyramidal cells fired at a preferentially earlier phase than their VIP counterparts, indicating that  
609 these cells might contribute to the emergence and/or amplification of these LFP oscillations  
610 through their sequential activation. While spindles are considered to be thalamic in origin, and  
611 induce phase-locking of rhythms in both neocortical and hippocampal networks (Latchoumane  
612 et al., 2017), it is currently unclear whether the spindles that we recorded on our LFP electrodes  
613 are mainly a representation of these propagating spindles, an emanation of local circuit  
614 properties, or a combination of both, as LFPs are notoriously difficult to interpret (Einevoll et  
615 al., 2013).

616 A majority of local cortical neurons were modulated by ongoing LFP slow delta waves during  
617 both wake and sleep. Only SSTs neurons displayed relatively weaker modulation, in accordance  
618 with a previous finding suggesting that their membrane potential dynamics were not correlated  
619 to those of surrounding neurons during quiet wakefulness (Gentet et al., 2012). Interestingly,  
620 this weaker modulation remained stable throughout the sleep/wake cycle as well as the  
621 preferred phase locking of all cortical neurons.

622 Whisking behavior in rodents is associated with their nocturnal foraging habits, as they explore  
623 their environment through the whisker sensing of surrounding objects (Petersen, 2014). While  
624 during REM sleep, mice display, just like humans, rapid-eye movements (Fulda et al., 2011),  
625 we surprisingly observed long-lasting bouts of whisking behavior in mice during REM sleep,  
626 despite the complete muscle atonia. We distinguish these bouts of whisking from previously  
627 reported REM “twitches” in the rat neonate (Tiriac et al., 2012) by their durations (over 1



628 second versus a few tens of milliseconds for twitches) and the amplitude of their protraction.  
629 Nevertheless, they differed from their wake counterparts in their higher peak frequency of  
630 oscillations, corresponding to smaller but faster protraction/retraction sweeps from an already  
631 protracted whisker position from rest. In this paper, we first confirm results obtained from  
632 previous studies showing whisking-related changes in interneuronal AP firing in awake head-  
633 fixed mice: while PV cells displayed heterogeneous modulation of their activity following the  
634 onset of free whisking, VIP neurons were more consistently activated during whisking, while  
635 SST firing was reduced, as previous findings (Gentet et al., 2010, 2012; Lee et al., 2013; Muñoz  
636 et al., 2017). During REM sleep however, whisking induced smaller increases and no  
637 significant decrease in VIP and SST neuronal activity, respectively. This differential  
638 modulation of VIP neurons and their target SST cells could help isolate the local circuit from  
639 top-down cortico-cortical and thalamic afferents impinging onto distal dendrites of excitatory  
640 principal pyramidal cells (Oda et al., 2004; Larkum et al., 2009). This raises the interesting  
641 prospect that REM whisking bouts might correspond to a brain state during which  
642 internalization of awake whisking behavior is re-experienced.

643 In summary, our study sheds light on the complex interplay between local cortical interneuronal  
644 firing activity and ongoing brain oscillatory dynamics across different vigilance states.  
645 Especially, we have shown that PV and VIP neurons may play prominent roles in dynamically  
646 suppressing, disengaging, or activating the local circuits at important time points of the  
647 sleep/wake cycle. The functional consequences of this dynamic interplay might be better  
648 observed at the level of perception of sensory inputs during sleep (Velluti, 1997; Nir et al.,  
649 2015) or consolidation of sensory memory traces acquired during wake (Buzsáki, 1989; van  
650 Dongen et al., 2011).

651

652

653

654



655 **BIBLIOGRAPHY**

- 656 Atallah B V., Bruns W, Carandini M, Scanziani M (2012) Parvalbumin-Expressing  
657 Interneurons Linearly Transform Cortical Responses to Visual Stimuli. *Neuron* 73:159–  
658 170 Available at: <http://dx.doi.org/10.1016/j.neuron.2011.12.013>.
- 659 Bates D, Mächler M, Bolker BM, Walker SC (2015) Fitting linear mixed-effects models using  
660 lme4. *J Stat Softw* 67.
- 661 Born J, Rasch B, Gais S (2006) Sleep to remember. *Neuroscientist* 12:410–424.
- 662 Bouchard MB, Chen BR, Burgess SA, Hillman EMC (2009) Ultra-fast multispectral optical  
663 imaging of cortical oxygenation, blood flow, and intracellular calcium dynamics. *J*  
664 *NeuroPathol Exp Neurol* 17:509–509.
- 665 Buzsáki G (1989) Two-stage model of memory trace formation: A role for “noisy” brain  
666 states. *Neuroscience* 31:551–570.
- 667 Buzsaki G (2002) Theta Oscillations in the Hippocampus. *Neuron* 33:325–340.
- 668 Chen TW, Wardill TJ, Sun Y, Pulver SR, Renninger SL, Baohan A, Schreiter ER, Kerr RA,  
669 Orger MB, Jayaraman V, Looger LL, Svoboda K, Kim DS (2013) Ultrasensitive  
670 fluorescent proteins for imaging neuronal activity. *Nature* 499:295–300.
- 671 Cirelli C (2017) Sleep, synaptic homeostasis and neuronal firing rates. *Curr Opin Neurobiol*  
672 44:72–79 Available at: <http://dx.doi.org/10.1016/j.conb.2017.03.016>.
- 673 Contreras D, Steriade M (1995) Cellular basis of EEG slow rhythms: A study of dynamic  
674 corticothalamic relationships. *J Neurosci* 15:604–622.
- 675 Crunelli V, Cope DW, Hughes SW (2011) UKPMC Funders Group Thalamic T-type Ca<sup>2+</sup>  
676 channels and NREM sleep. 40:175–190.
- 677 Einevoll GT, Kayser C, Logothetis NK, Panzeri S (2013) Modelling and analysis of local  
678 field potentials for studying the function of cortical circuits. *Nat Rev Neurosci* 14:770–  
679 785.
- 680 Fang G, Zhang C, Xia Y, Lai Y, Liu T, You Z, Yao D (2009) The effect of different EEG  
681 derivations on sleep staging in rats: The frontal midline-parietal bipolar electrode for  
682 sleep scoring. *Physiol Meas* 30:589–601.
- 683 Fernandez, L., Lüthi, A. (2020). Sleep spindles: mechanisms and functions. *Physiological*  
684 *Reviews* 100(2), 805-868.
- 685 Fulda S, Romanowski CPN, Becker A, Wetter TC, Kimura M, Fenzel T (2011) Rapid eye  
686 movements during sleep in mice: High trait-like stability qualifies rapid eye movement  
687 density for characterization of phenotypic variation in sleep patterns of rodents. *BMC*  
688 *Neuroscience*, 12-110.

- 689 Funk CM, Peelman K, Bellesi M, Marshall W, Cirelli C, Tononi G (2017) Role of  
690 somatostatin-positive cortical interneurons in the generation of sleep slow waves. *J*  
691 *Neurosci* 37:9132–9148.
- 692 Gentet LJ (2012) Functional diversity of supragranular GABAergic neurons in the barrel  
693 cortex. *Front Neural Circuits* 6:1–13.
- 694 Gentet LJ, Avermann M, Matyas F, Staiger JF, Petersen CCH (2010) Membrane Potential  
695 Dynamics of GABAergic Neurons in the Barrel Cortex of Behaving Mice. *Neuron*  
696 65:422–435 Available at: <http://dx.doi.org/10.1016/j.neuron.2010.01.006>.
- 697 Girardeau G, Benchenane K, Wiener SI, Buzsáki G, Zugaro MB (2009) Selective suppression  
698 of hippocampal ripples impairs spatial memory. *Nat Neurosci* 12:1222–1223 Available  
699 at: <http://dx.doi.org/10.1038/nn.2384>.
- 700 Hobson JA, McCarley RW (1971) Cortical unit activity in sleep and waking.  
701 *Electroencephalogr Clin Neurophysiol* 30:97–112.
- 702 Ji D, Wilson MA (2007) Coordinated memory replay in the visual cortex and hippocampus  
703 during sleep. *Nat Neurosci* 10:100–107.
- 704 Jiang X, Lachance M, Rossignol E (2016) Involvement of cortical fast-spiking parvalbumin-  
705 positive basket cells in epilepsy. *Prog Brain Res* 226.
- 706 Kawaguchi Y, Kubota Y (1997) GABAergic cell subtypes and their synaptic connections in  
707 rat frontal cortex. *Cereb Cortex* 7:476–486.
- 708 Kay K, Frank LM (2019) Three brain states in the hippocampus and cortex. *Hippocampus*  
709 29:184–238.
- 710 Koike BDV, Farias KS, Billwiller F, Almeida-Filho D, Libourel PA, Tiran-Cappello A,  
711 Parmentier R, Blanco W, Ribeiro S, Luppi PH, Queiroz CM (2017) Electrophysiological  
712 evidence that the retrosplenial cortex displays a strong and specific activation phased  
713 with hippocampal theta during paradoxical (REM) sleep. *J Neurosci* 37:8003–8013.
- 714 Larkum ME (2009) Synaptic Integration in Tuft Dendrites. *Science* (80- ) 756:756–761.
- 715 Latchoumane CF V., Ngo HV V., Born J, Shin HS (2017) Thalamic Spindles Promote  
716 Memory Formation during Sleep through Triple Phase-Locking of Cortical, Thalamic,  
717 and Hippocampal Rhythms. *Neuron* 95:424–435.e6 Available at:  
718 <http://dx.doi.org/10.1016/j.neuron.2017.06.025>.
- 719 Lee S, Kruglikov I, Huang ZJ, Fishell G, Rudy B (2013) A disinhibitory circuit mediates  
720 motor integration in the somatosensory cortex. *Nat Neurosci* 16:1662–1670 Available at:  
721 <http://dx.doi.org/10.1038/nn.3544>.
- 722 Maingret N, Girardeau G, Todorova R, Goutierre M, Zugaro M (2016) Hippocampo-cortical  
723 coupling mediates memory consolidation during sleep. *Nat Neurosci* 19:959–964.

- 724 Margrie TW, Meyer AH, Caputi A, Monyer H, Hasan MT, Schaefer AT, Denk W, Brecht M  
725 (2003) Targeted whole-cell recordings in the mammalian brain in vivo. *Neuron* 39:911–  
726 918.
- 727 Miyawaki H, Watson BO, Diba K (2019) Neuronal firing rates diverge during REM and  
728 homogenize during non-REM OPEN. *Sci Rep* 9 Available at:  
729 [www.nature.com/scientificreports/](http://www.nature.com/scientificreports/) [Accessed August 21, 2020].
- 730 Montgomery SM, Sirota A, Buzsáki G (2008) Theta and gamma coordination of hippocampal  
731 networks during waking and rapid eye movement sleep. *J Neurosci* 28:6731–6741.
- 732 Muñoz W, Tremblay R, Levenstein D, Rudy B (2017) Layer-specific modulation of  
733 neocortical dendritic inhibition during active wakefulness. *Science* (80- ) 355:954  
734 Available at: [www.sciencemag.org/content/355/6328/954/suppl/DC1](http://www.sciencemag.org/content/355/6328/954/suppl/DC1) [Accessed August  
735 6, 2020].
- 736 Murayama M, Larkum ME (2009) Enhanced dendritic activity in awake rats. *Proc Natl Acad  
737 Sci U S A* 106:20482–20486.
- 738 Niethard N, Hasegawa M, Itokazu T, Oyanedel CN, Born J, Sato TR (2016) Sleep-Stage-  
739 Specific Regulation of Cortical Excitation and Inhibition. *Curr Biol* 26:2739–2749  
740 Available at:  
741 <http://dx.doi.org/10.1016/j.cub.2016.08.035>  
742 <http://dx.doi.org/10.1016/j.cub.2016.08.035>  
[Accessed July 9, 2020].
- 743 Niethard N, Ngo H-V V, Ehrlich I, Born J, Hertie D (2018) Cortical circuit activity  
744 underlying sleep slow oscillations and spindles. *PNAS* 115 Available at:  
745 [www.pnas.org/cgi/doi/10.1073/pnas.1805517115](http://www.pnas.org/cgi/doi/10.1073/pnas.1805517115) [Accessed July 8, 2020].
- 746 Nir Y, Vyazovskiy V V., Cirelli C, Banks MI, Tononi G (2015) Auditory responses and  
747 stimulus-specific adaptation in rat auditory cortex are preserved across NREM and REM  
748 sleep. *Cereb Cortex* 25:1362–1378.
- 749 Oda S, Kishi K, Yang J, Chen S, Yokofujita J, Igarashi H, Tanihata S, Kuroda M (2004)  
750 Thalamocortical projection from the ventral posteromedial nucleus sends its collaterals  
751 to layer I of the primary somatosensory cortex in rat. *Neurosci Lett* 367:394–398.
- 752 Perrenoud Q, Pennartz CMA, Gentet LJ (2016) Membrane Potential Dynamics of  
753 Spontaneous and Visually Evoked Gamma Activity in V1 of Awake Mice. *PLoS Biol*  
754 14:1–21.
- 755 Petersen CCH (2014) Cortical control of whisker movement. *Annu Rev Neurosci* 37:183–  
756 203.
- 757 Petersen CCH (2019) Sensorimotor processing in the rodent barrel cortex. *Nat Rev Neurosci*  
758 20:533–546 Available at: <http://dx.doi.org/10.1038/s41583-019-0200-y>.
- 759 Peyrache A, Battaglia FP, Destexhe A (2011) Inhibition recruitment in prefrontal cortex  
760 during sleep spindles and gating of hippocampal inputs. *PNAS* 108 Available at:  
761 [www.pnas.org/cgi/doi/10.1073/pnas.1103612108](http://www.pnas.org/cgi/doi/10.1073/pnas.1103612108) [Accessed July 9, 2020].

- 762 Pfeffer CK, Xue M, He M, Huang ZJ, Scanziani M (2013) Inhibition of inhibition in visual  
763 cortex: The logic of connections between molecularly distinct interneurons. *Nat Neurosci*  
764 16:1068–1076 Available at: <http://dx.doi.org/10.1038/nn.3446>.
- 765 Prönneke A, Witte M, Möck M, Staiger JF (2020) Neuromodulation leads to a burst-tonic  
766 switch in a subset of VIP neurons in mouse primary somatosensory (Barrel) cortex.  
767 *Cereb Cortex* 30:488–504.
- 768 Steriade M, Timofeev I, Grenier F (2001) Natural Waking and Sleep States: A View From  
769 Inside Neocortical Neurons. *J Physiol* Available at: [www.jn.physiology.org](http://www.jn.physiology.org) [Accessed  
770 July 9, 2020].
- 771 Steriade M, Timofeev I (2003) Neuronal plasticity in thalamocortical networks during sleep  
772 and waking oscillations. *Neuron* 37:563–576.
- 773 Takahashi K, Lin JS, Sakai K (2006) Neuronal activity of histaminergic tuberomammillary  
774 neurons during wake-sleep states in the mouse. *J Neurosci* 26:10292–10298.
- 775 Tiriac A, Uitermarkt BD, Fanning AS, Sokoloff G, Blumberg MS (2012) Rapid whisker  
776 movements in sleeping newborn rats. *Curr Biol* 22:2075–2080 Available at:  
777 <http://dx.doi.org/10.1016/j.cub.2012.09.009>.
- 778 Todorova R, Zugaro M (2019) Isolated cortical computations during delta waves support  
779 memory consolidation. *Science* (80- ) 366 Available at: <http://science.sciencemag.org/>.
- 780 Tononi, Giulio and Cirelli C (2009) Sleep and the Price of Plasticity: From Synaptic to  
781 cellular Homeostasis to Memory Consolidation and Integration. *Neuron* 49:1841–1850.
- 782 Tremblay R, Lee S, Rudy B (2016) GABAergic Interneurons in the Neocortex: From Cellular  
783 Properties to Circuits. *Neuron* 91:260–292 Available at: [http://dx.](http://dx.doi.org/) [Accessed August 24,  
784 2020].
- 785 Urbain N, Fourcaud-Trocmé N, Laheux S, Salin PA, Gentet LJ (2019) Brain-State-Dependent  
786 Modulation of Neuronal Firing and Membrane Potential Dynamics in the Somatosensory  
787 Thalamus during Natural Sleep. *Cell Rep* 26:1443-1457.e5.
- 788 van Dongen E V., Takashima A, Barth M, Fernández G (2011) Functional connectivity during  
789 light sleep is correlated with memory performance for face-location associations.  
790 *Neuroimage* 57:262–270 Available at:  
791 <http://dx.doi.org/10.1016/j.neuroimage.2011.04.019>.
- 792 Vaz AP, Inati SK, Zaghoul KA (2020) Replay of cortical spiking sequences during human  
793 memory retrieval. *Science* (80- ) 367:1131–1134.
- 794 Velluti RA (1997) Interactions between sleep and sensory physiology. *J Sleep Res* 6:61–77.
- 795 Vijayan S, Hale GJ, Moore CI, Brown EN, Wilson M (2010) Activity in the barrel cortex  
796 during active behavior and sleep. *J Neurophysiol* 103:2074–2084.

- 797 Vinck M, Bos JJ, van Mourik-Donga LA, Oplaat KT, Klein GA, Jackson JC, Gentet LJ,  
798 Pennartz CMA (2016) Cell-type and state-dependent synchronization among rodent  
799 somatosensory, visual, perirhinal cortex, and hippocampus CA1. *Front Syst Neurosci*  
800 9:1–25.
- 801 Vyazovskiy V V., Olcese U, Lazimy YM, Faraguna U, Esser SK, Williams JC, Cirelli C,  
802 Tononi G (2009) Cortical Firing and Sleep Homeostasis. *Neuron* 63:865–878.
- 803 Watson BO, Levenstein D, Greene JP, Gelinás JN, Buzsáki G (2016) Network Homeostasis  
804 and State Dynamics of Neocortical Sleep. *Neuron* 90:839–852.
- 805 Welker WI (1964) Analysis of sniffing of the albino rat. *Behav Leiden* 22:223–244.
- 806 Xiaolong Jiang, Shen S, Cadwell CR, Berens P, Sinz F, Ecker AS, Patel S, Tolias AS (2015)  
807 Principles of connectivity among morphologically defined cell types in adult neocortex.  
808 *Science* (80- ) 350.
- 809 Yu J, Hu H, Agmon A, Svoboda K (2019) Recruitment of GABAergic Interneurons in the  
810 Barrel Cortex during Active Tactile Behavior. *Neuron* 104:412–427 Available at:  
811 <https://doi.org/10.1016/j.neuron.2019.07.027>.



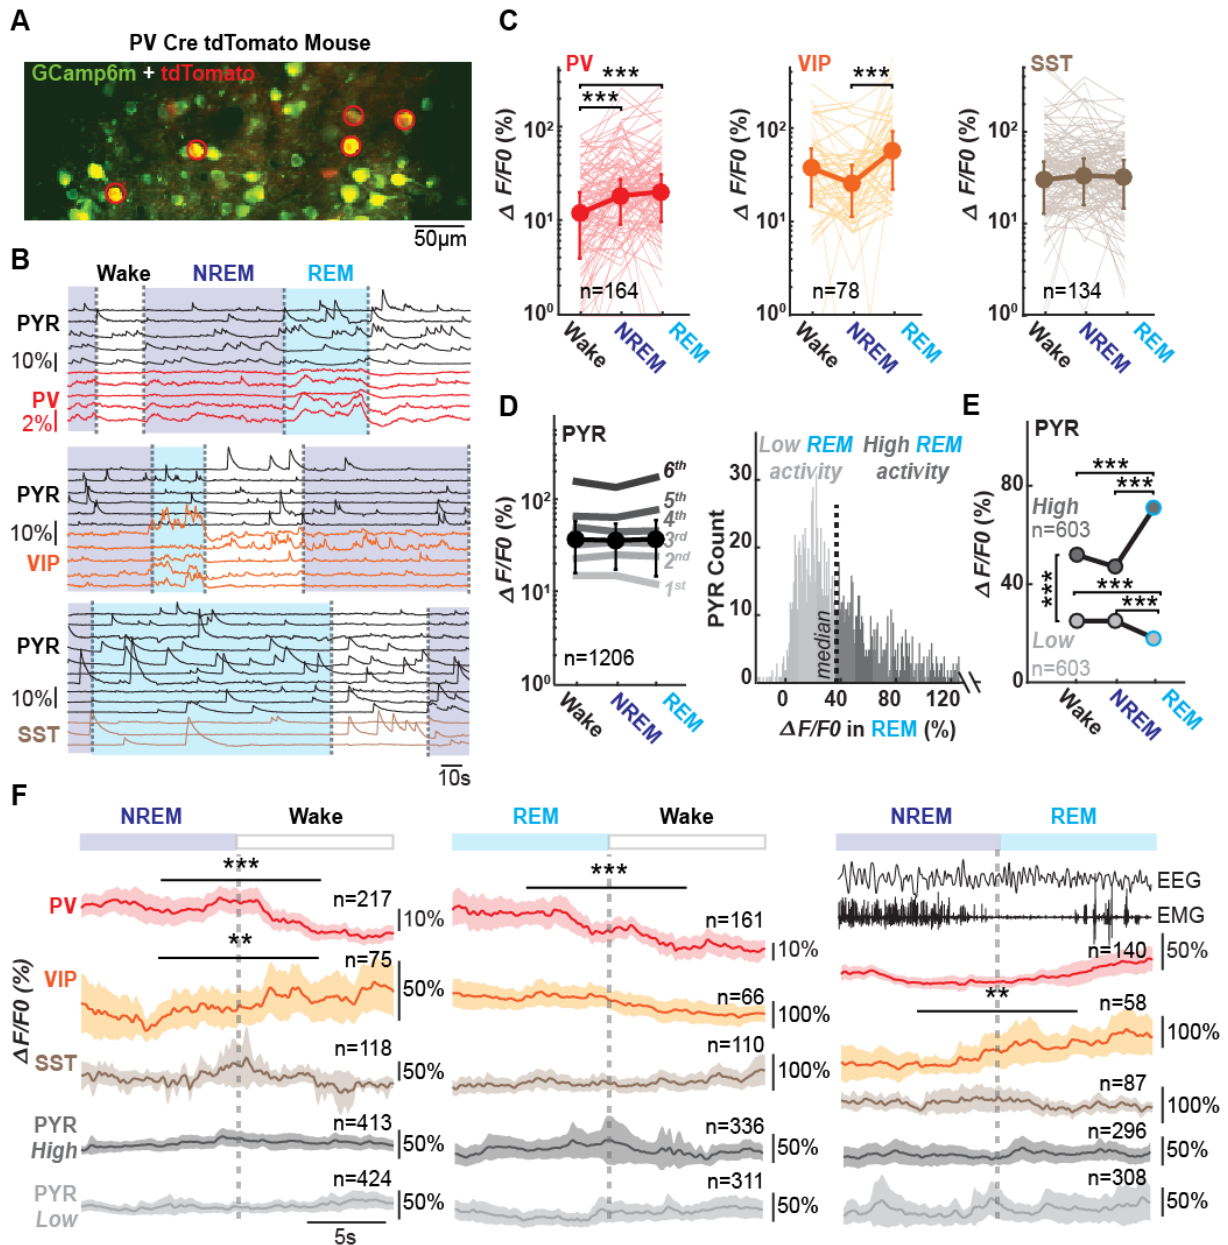

**Figure 1: Calcium fluorescence activity changes across the sleep-wake cycle for pyramidal cells and interneurons.** **A.** Example of a recording field in the layers 2/3 of barrel cortex in a PV Cre-tdTomato mouse. All neurons in green express GCaMP6m, while PV neurons express in addition tdTomato in red. PV cells expressing both red and green fluorescences are marked by a red circle. **B.** Changes in GCaMP6m fluorescence across time and vigilance states for each detected neurons in one recording field. Example calcium traces in a PV Cre-tdTomato (top, same as in A), a VIP Cre-tdTomato (middle) and in a SST Cre-tdTomato mouse (bottom). **C.** Median changes in fluorescence across vigilance states for each interneuronal subtype. **D.** Median changes in fluorescence of putative PYR across vigilance states (bold line). Additionally, PYR cell population was divided into sextiles according to their activity during wake (left). Histogram distribution of pyramidal cells according to their activity in REM sleep, divided separated into two halves, PYR with low REM activity and PYR with high REM activity (right). **E.** Changes in fluorescence for high REM and low REM activity PYR across vigilance states. **F.** Dynamics of calcium activity at wake onset from NREM (left), REM (middle) sleep, and at REM onset from NREM sleep (right, from -10 s to +10 s around transitions marked by a dotted grey line). Above right, Example raw EEG and EMG traces for a NREM to REM transition. *PV*: parvalbumin cells; *VIP*: vaso-actif intestinal peptide cells; *SST*: somatostatin cells; *PYR*: pyramidal cells. Medians and median absolute deviations are represented in C and D and Friedman tests were performed. Medians are represented in E and Friedman tests were performed to compare activity during vigilance

*state while Kruskal Wallis tests were performed to compare activity of PYR low and high REM activity. Means and confidence intervals are represented in F and Wilcoxon sign rank tests were performed.*



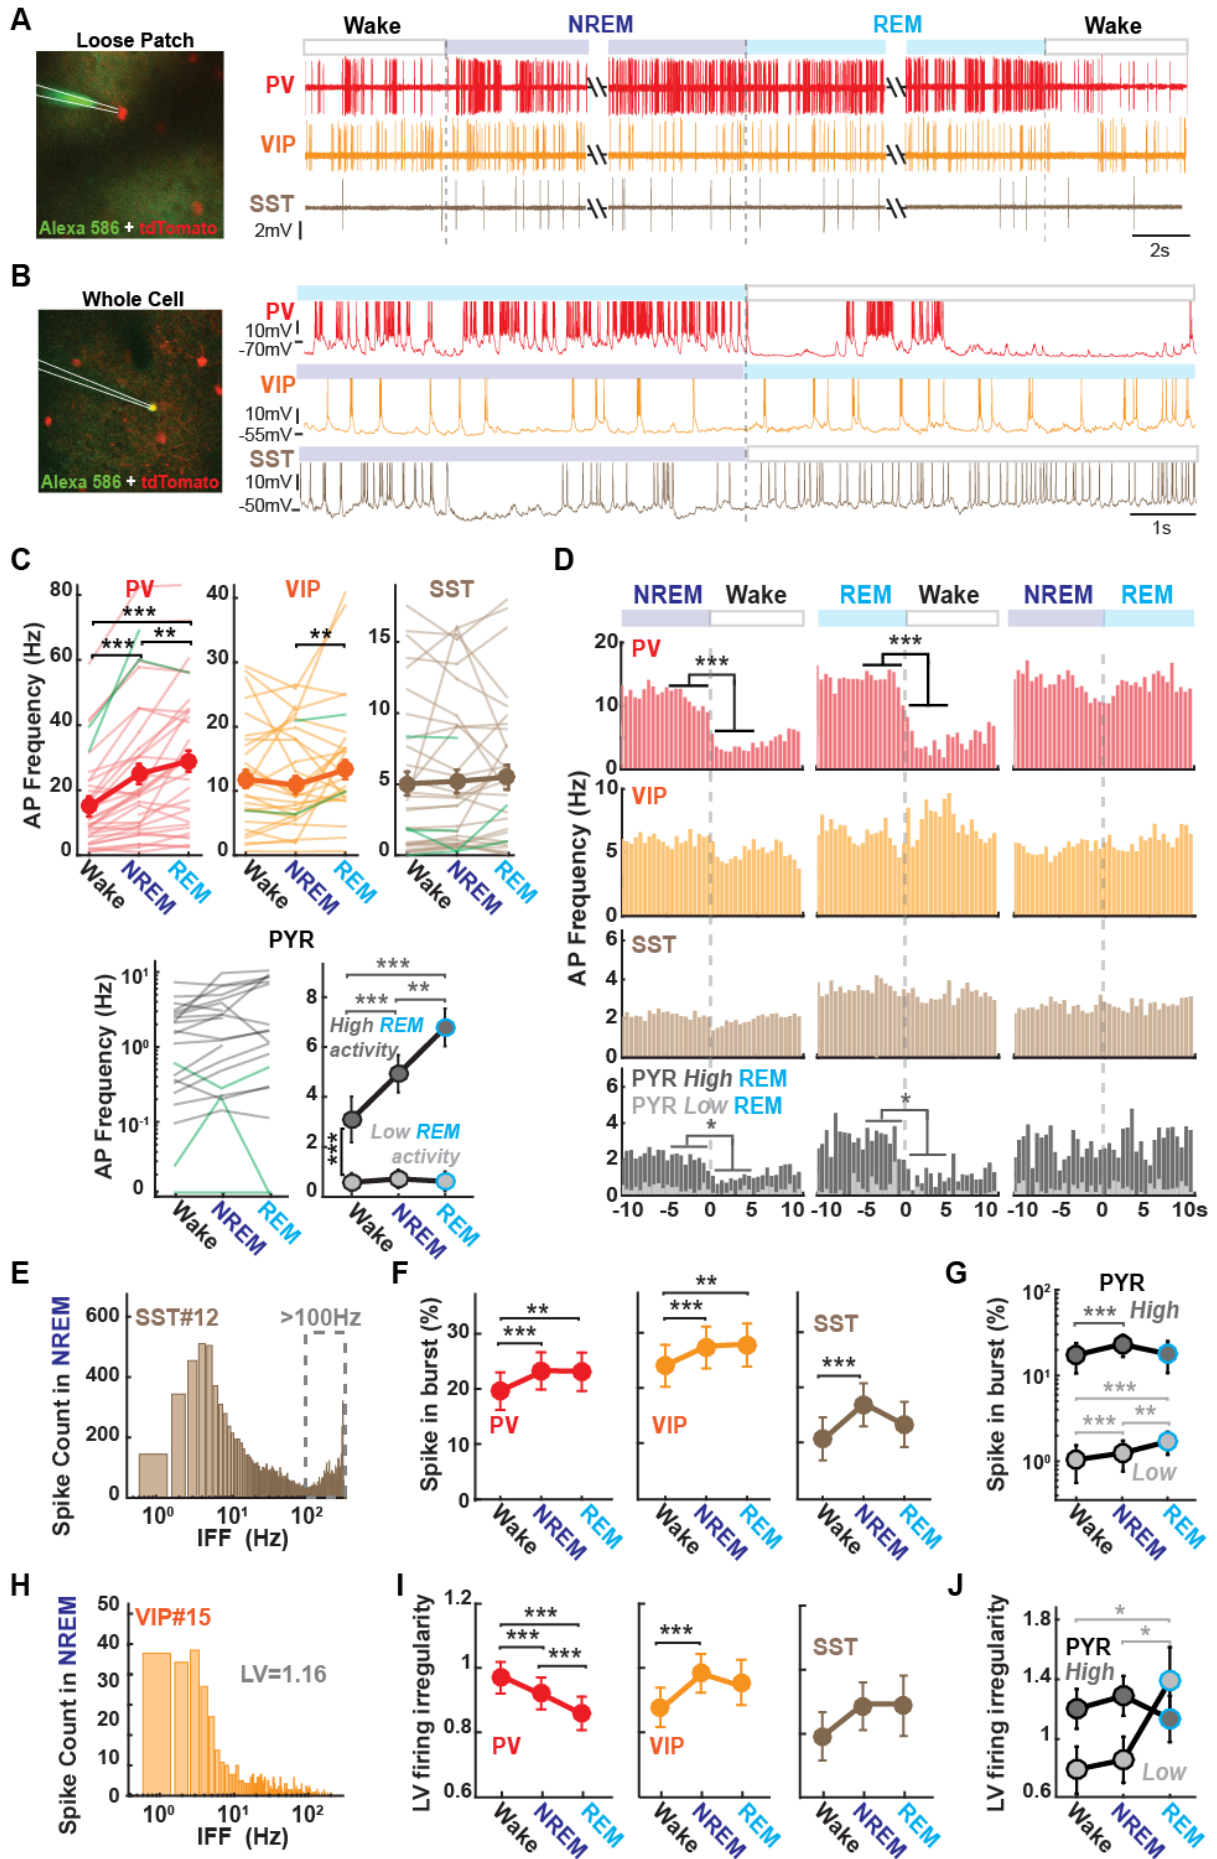

**Figure 2: Sleep-wake cycle influences cortical firing rates and pattern.** **A.** Loose-patch recordings. Left, z-stack image illustrating the position of a glass pipette (white lines) in loose-patch configuration. Right: example raw traces for a PV, VIP and SST neuron across different vigilance states. **B.** Whole-cell patch-clamp recordings. Left, z-stack image illustrating the position of a glass pipette (white lines) in whole-cell-patch-clamp configuration. Right, example membrane potential traces for a PV, VIP and SST neuron across different vigilance states. APs have been truncated. **C.** Top: Average firing activity for each interneuronal subtype across vigilance states (**bold**). Individual loose-patched cells are represented in light and whole-cell patched neurons in green. Bottom left: Firing rates for putative PYR cells across vigilance states in loose-patch (in grey) or whole-cell (green) configurations. Bottom right: Mean AP frequencies for high and low REM activity PYR cells. **D.** Average histograms for different vigilance state transitions (bin size = 500 ms) for each neuronal subtype. **E.** Example instantaneous firing frequency (IFF) distribution for one representative SST cell during NREM sleep. Frequency range > 100 Hz was chosen to define high-frequency bursts. **F.** Percentage of high frequency bursts according to vigilance state for PV, VIP and SST cells. **G.** Same as in F, but for putative PYR neurons with high and low REM activity. **H.** Same as in E for one representative VIP cell during NREM sleep. Local coefficient of variation (LV) measures of the firing irregularity have been estimated for each cell and vigilance states. **I.** LV for each neuronal cell type across vigilance states. **J.** Same as in I, but for PYR cells with high and low REM activity. *AP: action potential. Estimated means and standard errors of mean are represented in bold in C, F, G, I and J and LMM were performed (see Methods). Means are represented in D and Wilcoxon sign rank tests were performed.*

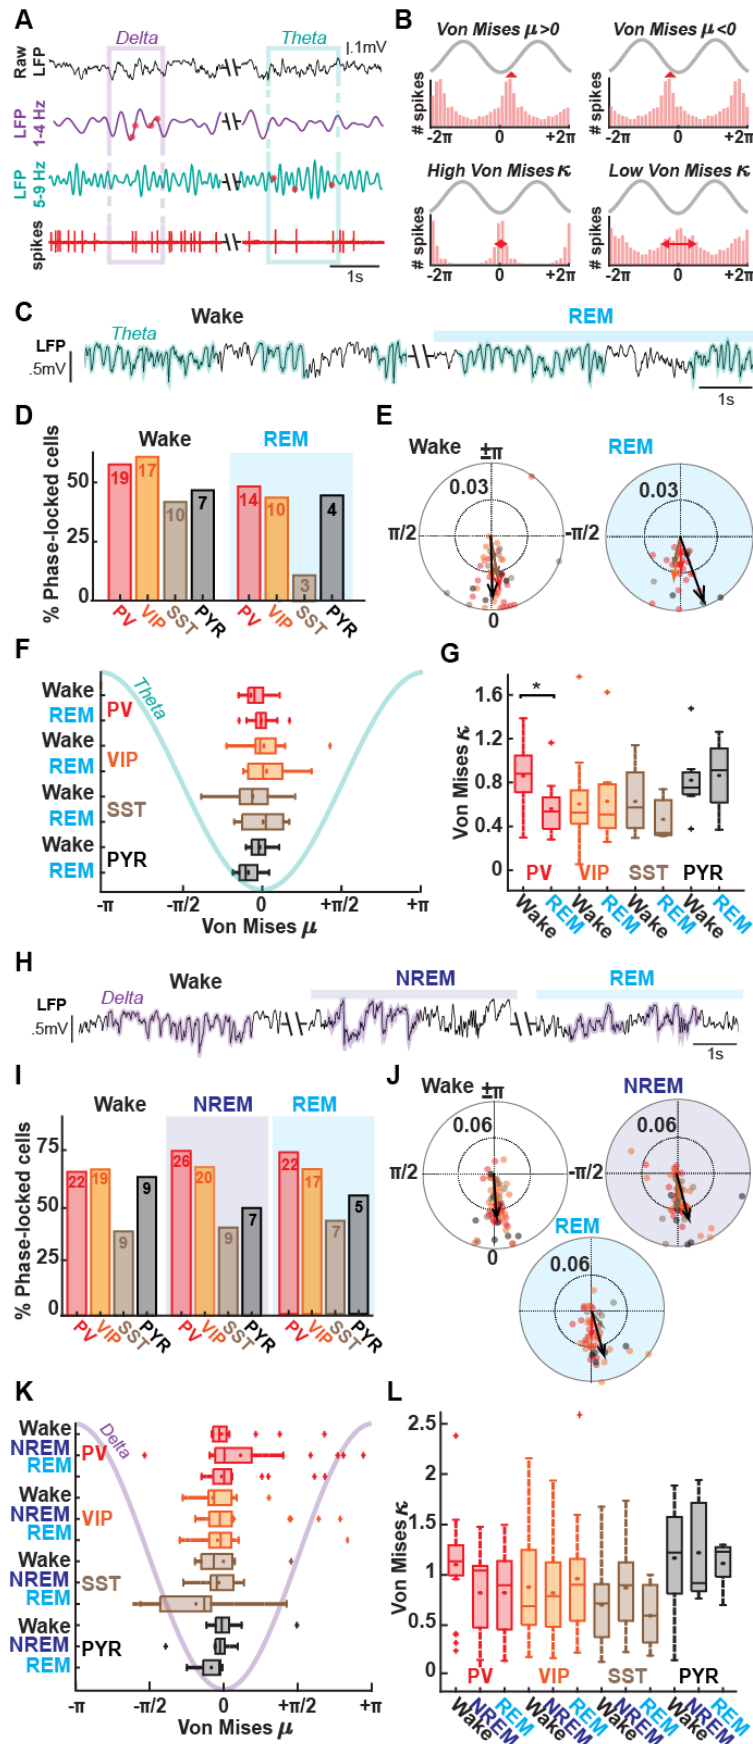

**Figure 3: Theta and delta oscillations phase-locking of spikes across vigilance states. A.** Spike timing on delta (1 - 4 Hz) and theta (5 - 9 Hz) bouts detected on filtered somatosensory barrel cortex (wS1) LFP (see Methods). **B.** Two parameters extracted per cell: the peak  $\mu$  (on top) and the

concentration  $\kappa$  (bottom) of the phase locking computed from a Von Mises curve fitting on spike distribution. **C.** Example raw LFP trace showing detected theta bouts (green) during wake (left) and REM sleep (right). **D.** Percentage of neurons phased-locked to theta oscillations in wake and REM. A Rayleigh test was performed on each cell to detect if they were modulated by theta oscillations ( $p < 0.01$ ). **E.** Circular plots for all neurons modulated by theta oscillations in wake and in REM. Each dot represents a modulated cell and the arrows the mean for that population (same color code as D). **F.** Average peaks of the phase locking by neuronal subtype. **G.** Average concentration of the phase locking by neuronal subtype. **H.** Example raw LFP trace showing detected delta bouts (violet) during wake (left), NREM (middle) and REM sleep (right). **I.** Same as in D for delta waves detected in wake, NREM and REM sleep. **J.** Same as in E for delta waves. **K.** Same as in F for delta waves. **L.** Same as in G. for delta waves occurring in wake, NREM and REM sleep. *25<sup>th</sup> and 75<sup>th</sup> percentiles are represented with median (bar) and mean (dot) in boxplots in F, G, K and L and Kruskal Wallis tests were performed.*

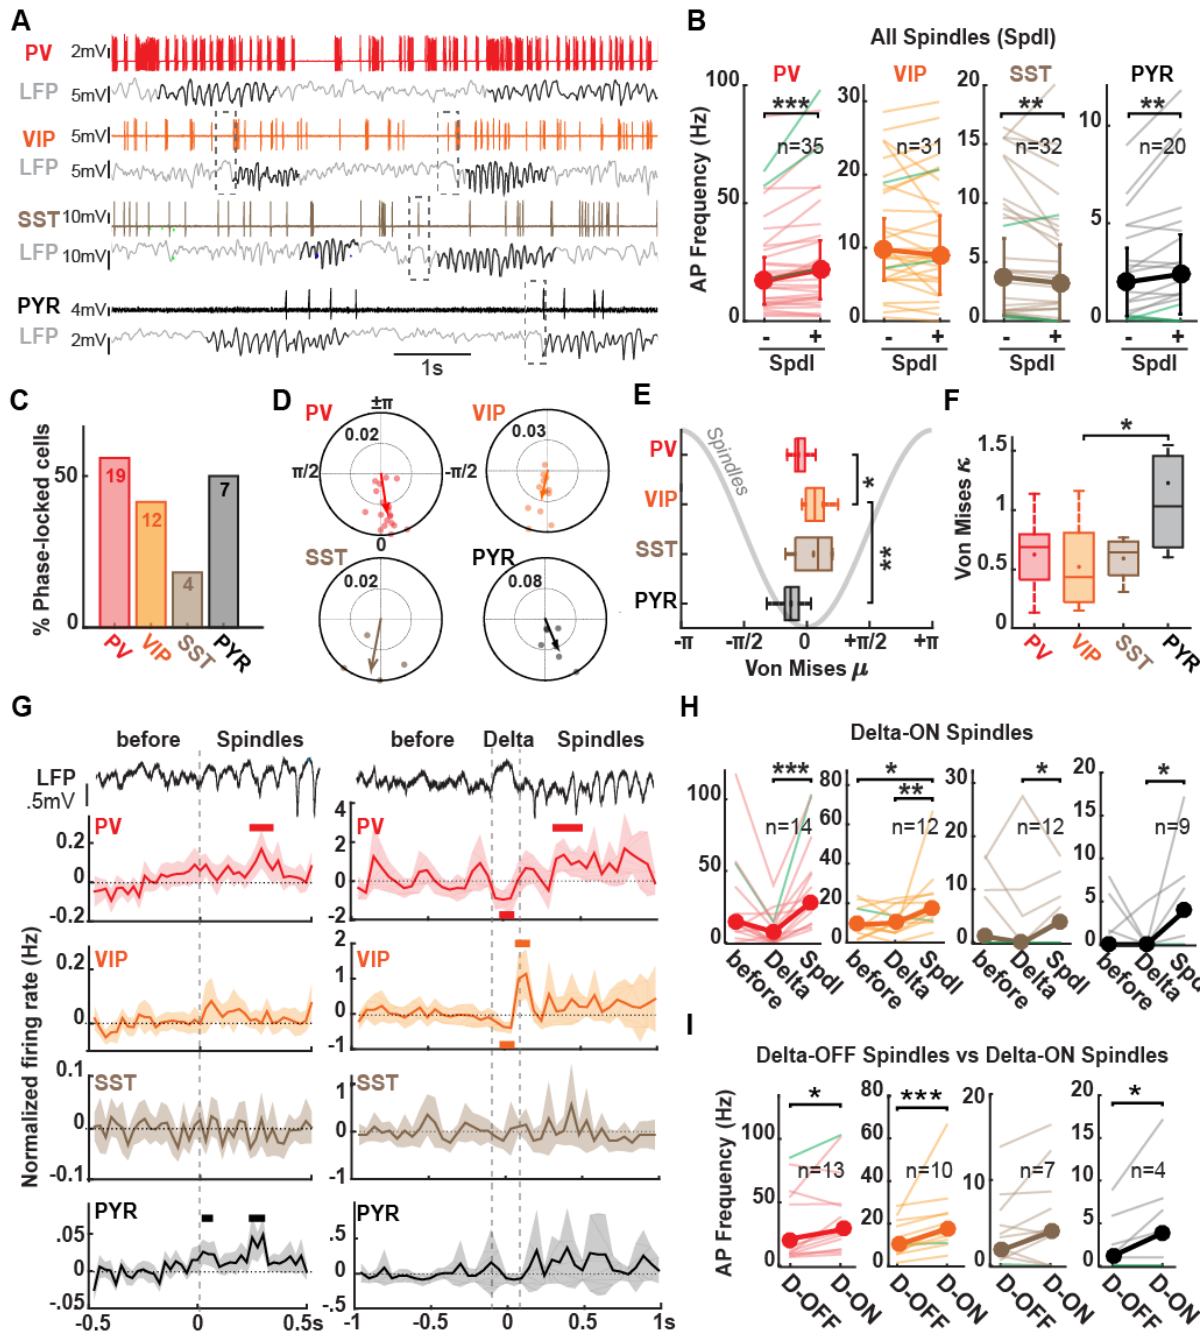

**Figure 4: Modulation of interneuronal firing rates by sleep spindles in NREM sleep.** **A.** Example raw traces from a PV (top), VIP (middle), SST (middle) and PYR (bottom) neuron together with ongoing LFP activity. Spindle bouts are denoted in black. Delta events occurring before spindle bouts are indicated by dashed grey boxes. **B.** Average AP frequency (bold lines) during spindles (spdl+) and outside spindles (spdl-) for each cell type. Cells recorded in whole-cell patch mode are shown in green. **C.** Percentage of neurons phased-locked to spindle oscillations. A Rayleigh test was performed on each cell to detect if they were modulated by sleep spindles ( $p < 0.01$ ). **D.** Circular plots for all modulated cells. Each circle represents a modulated cell, and the vector the mean for all modulated neurons. **E.** Average peaks of the phase locking by neuronal subtype. **F.** Average concentrations of the phase locking by neuronal subtype. **G.** Average normalized firing rates across delta-OFF spindles (left) or delta-ON spindles for each cell type. **H.** Average AP frequency before, during Delta event and during spindles for delta-ON spindle bouts for each cell type. **I.** Median firing rates during delta-ON (D-ON) vs delta-OFF (D-OFF) spindle bouts. Medians and median absolute deviations are represented in B, H and I. Wilcoxon sign rank tests were performed in B and I and Friedman tests were performed in H. 25<sup>th</sup> and

*75<sup>th</sup> percentiles are represented with median (bar) and mean (dot) in boxplots in E and F and Kruskal Wallis tests were performed. Means and confidence intervals are represented in G.*



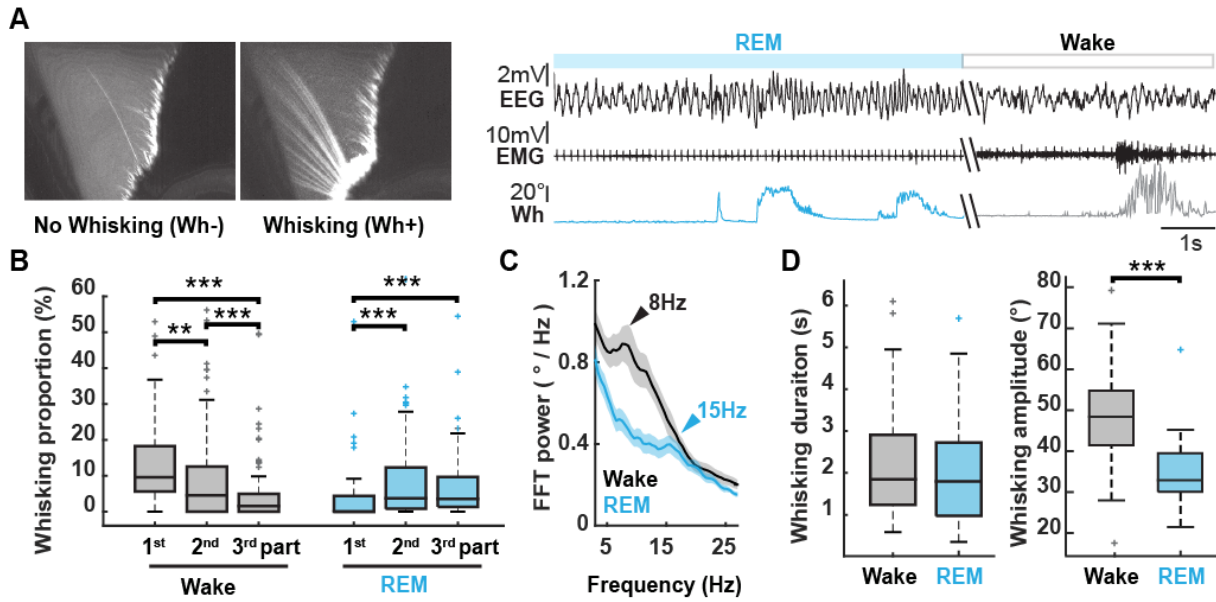

**Figure 5: Whisking bouts occur during both wake and REM sleep in naturally-sleeping mice. A.** Left: Mean picture of C2 whisker observed through a high-speed infrared camera in the absence or presence of whisker protractions. Right, Example EEG (top), EMG (middle), and Whisker position (bottom) traces during REM sleep and wake, showing bouts of whisking (> 1s) in both vigilance states. **B.** Percentage of time spent whisking during the first, second and third part of wake and REM sleep across all recorded episodes. Dots denote results per recording session. **C.** Grand mean average Fast Fourier Transform (FFT) of whisker position during whisking bouts occurring in wake (black) and REM sleep (cyan). FFTs were computed from 1s time windows for all bouts across all recording sessions. A peak at around 8 Hz during wake-whisking and at 15 Hz during REM-whisking are marked by black and blue arrows respectively. **D.** Average whisking bout durations (left) and amplitudes (right) during wake and REM sleep. 25<sup>th</sup> and 75<sup>th</sup> percentiles are represented with median (bar) in boxplots in B and D. Friedman tests were performed in B and Wilcoxon sign rank tests were performed in D. Means and confidence intervals are represented in C.

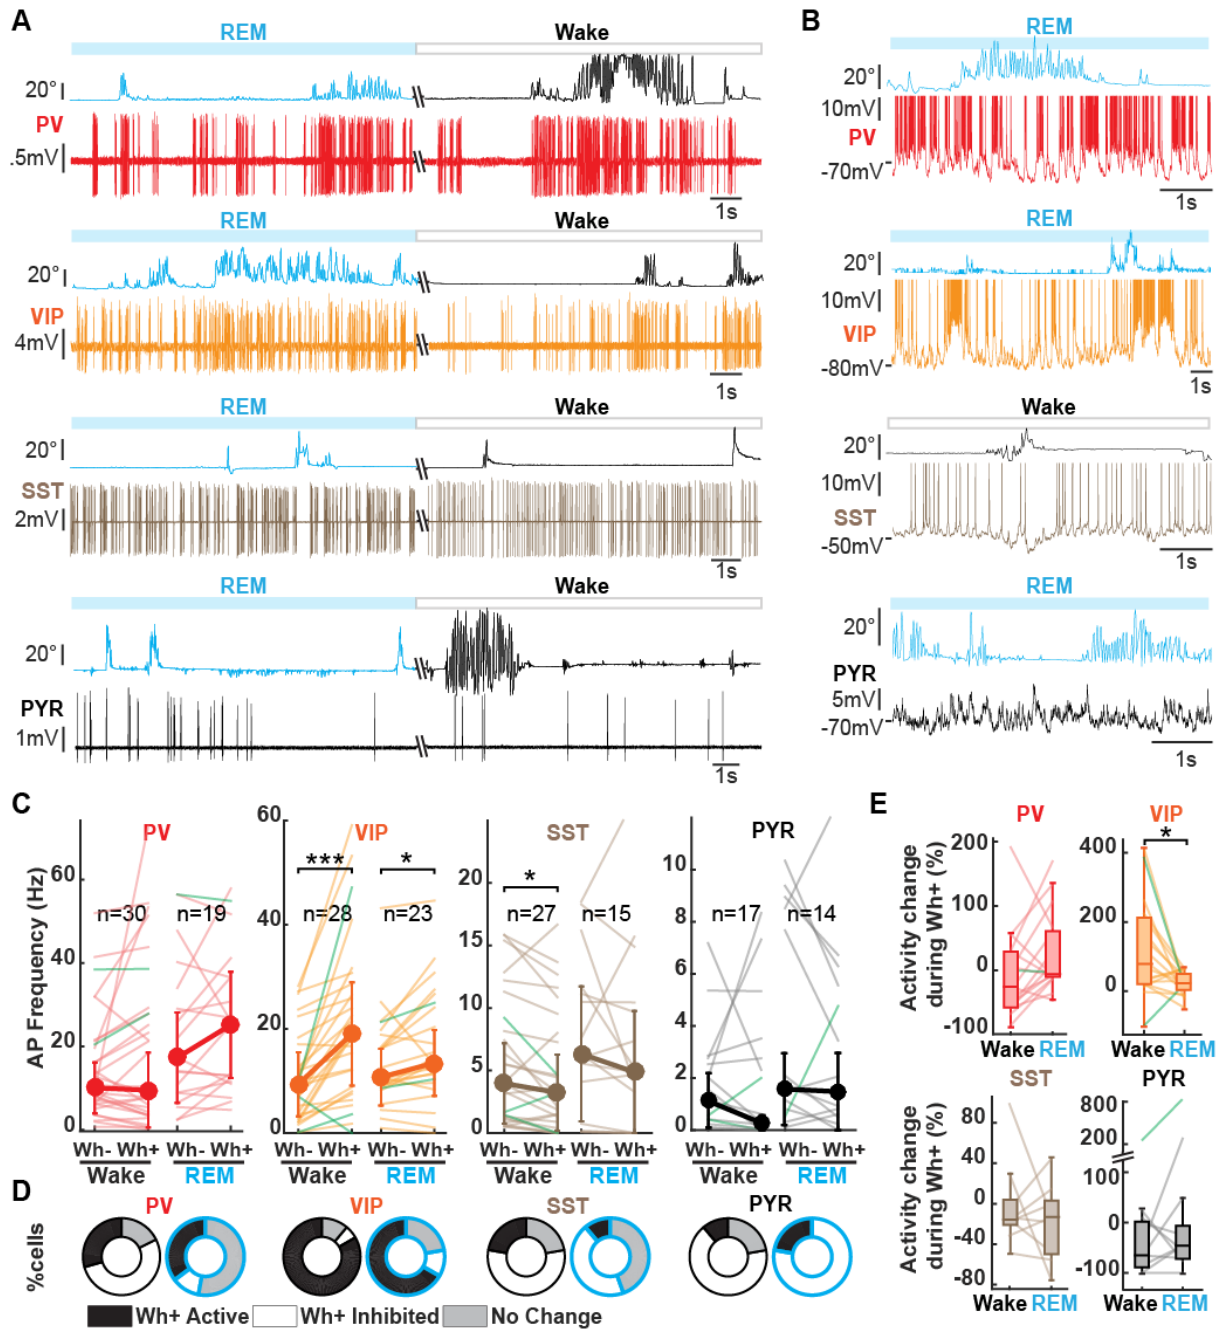

**Figure 6: Whisking modulates cortical interneurons firing rates.** **A.** Example raw traces of loose-patch recordings and whisker movements in wake and REM sleep for one PV (top, red), one VIP (middle, orange), one SST (middle, beige) and one PYR (bottom, black). **B.** Example raw traces of whole-cell recordings and whisker movement in wake or REM sleep (same color code as A). **C.** Median firing rates for PV, VIP, SST and PYR neurons during whisking bouts (Wh+) vs no whisking (Wh-). Cells recorded in loose-patch are represented in light color and whole-cell patch-clamped neurons in green. **D.** Percentage of cells per subtype and per vigilance state displaying either increased, decreased or no change in their firing rates during whisking vs no whisking. **E.** Activity change in % during whisking in wake vs REM compared to no whisking in wake and REM sleep. Medians and median absolute deviations are represented in C. 25<sup>th</sup> and 75<sup>th</sup> percentiles are represented with median (bar) in boxplots in E. Wilcoxon sign rank test were performed in C and E.
